# Supplementary material for: Gene co-expression network analysis reveals coordinated regulation of three characteristic secondary biosynthetic pathways in tea plant (Camellia sinensis)
Source: PubMed Central journal article supplement (PMC6094456; doi:10.1186/s12864-018-4999-9), 2018-08-15

# Cluster Dendrogram

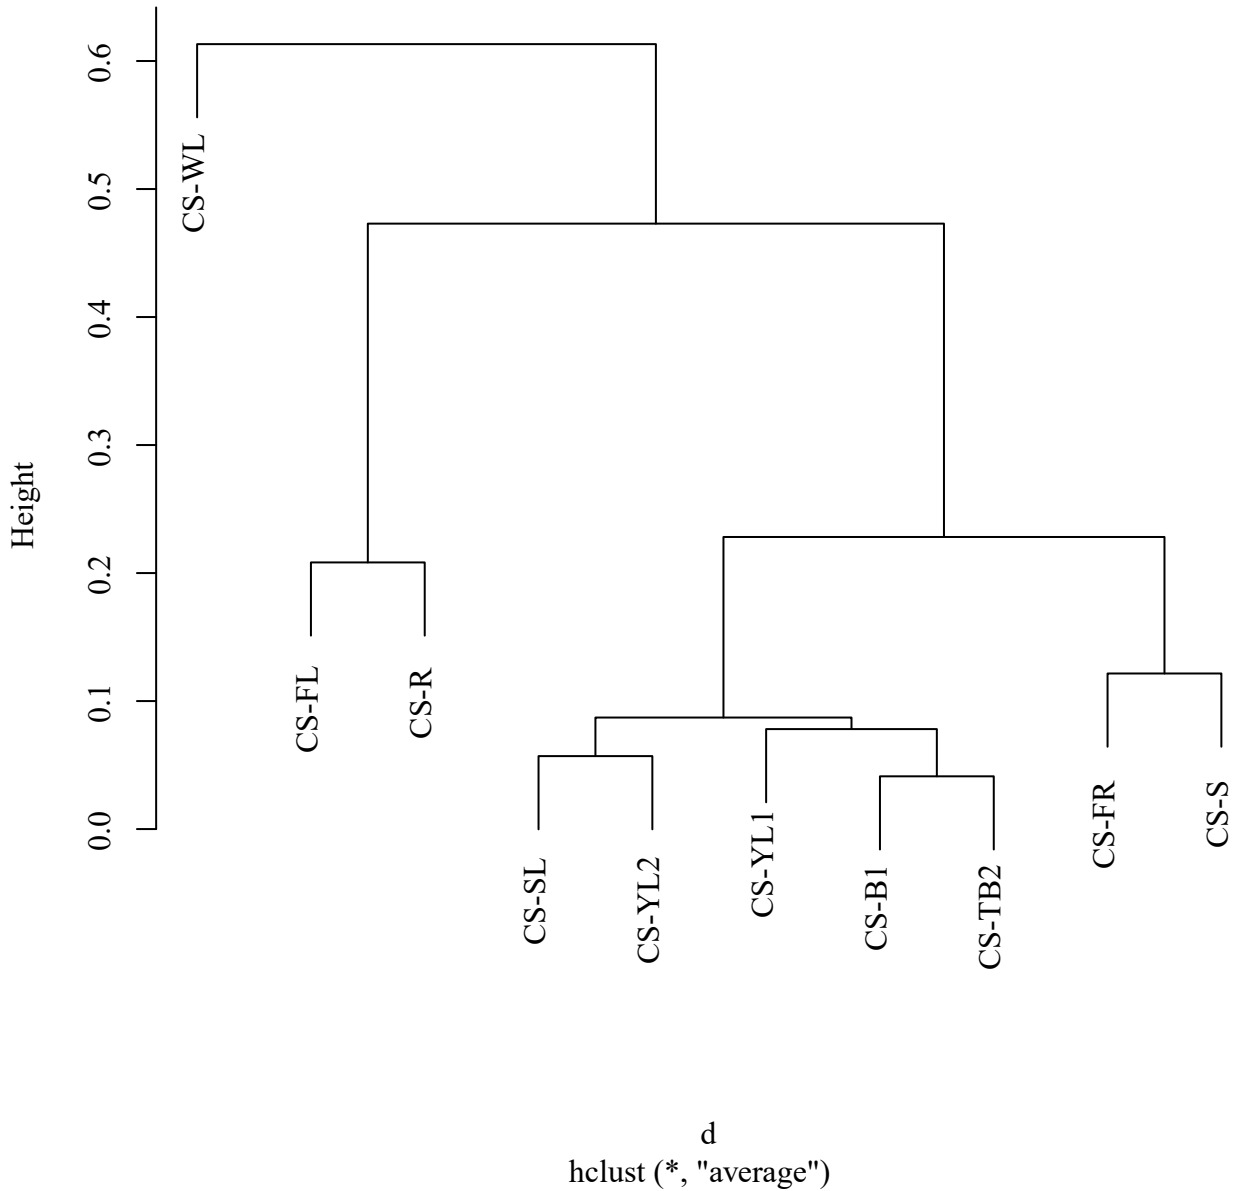

Supplement: 12864_2018_4999_MOESM1_ESM.pdf [file 12864_2018_4999_MOESM1_ESM.pdf]
