# Supplementary material for: Gene co-expression network analysis reveals coordinated regulation of three characteristic secondary biosynthetic pathways in tea plant (Camellia sinensis)
Source: BMC Genomics. 2018 Aug 15;19:616. doi: 10.1186/s12864-018-4999-9 (PMC6094456; doi:10.1186/s12864-018-4999-9)
Supplement: Supplementary file 4 — Hub genes for each highly significant content-related module. (XLSX 54 kb) [file 12864_2018_4999_MOESM4_ESM.xlsx]

## Sheet: Additional file 4
Module	GeneID	kwithin	Nr	Nt	Swissprot	KEGG
blue	CL884.Contig2_All	168.475	gi|449506534|PREDICTED: 18.2 kDa class I heat shock protein-like	gi|99033708|Agave tequilana clone 7.8 chaperone	18.1 kDa class I heat shock protein OS=Arabidopsis thaliana GN=HSP18.1 PE=2 SV=1	18.1 kDa class I heat shock protein-like; K13993 HSP20 family protein
blue	CL5256.Contig1_All	202.146	gi|225444207|PREDICTED: gamma-soluble NSF attachment protein	gi|225444206|PREDICTED: Vitis vinifera gamma-soluble NSF attachment protein-like	Gamma-soluble NSF attachment protein OS=Arabidopsis thaliana GN=GSNAP PE=2 SV=1	26S proteasome AAA-ATPase subunit RPT4a (ISS); K03064 26S proteasome regulatory subunit T4
blue	CL7056.Contig1_All	167.408	gi|567861340|hypothetical protein CICLE_v10029627mg	gi|568867798|PREDICTED: Citrus sinensis 40S ribosomal protein S25-2-like	40S ribosomal protein S25 OS=Solanum lycopersicum GN=RPS25 PE=3 SV=1	40S ribosomal protein S25-2-like; K02975 small subunit ribosomal protein S25e
blue	CL2448.Contig3_All	216.643	gi|330318574|gb|AEC10957.1|/1.10165e-91/ribosomal petrp-like protein	gi|Camellia sinensis clone U10BCDNA 1298 ribosomal petrp-like protein	60S ribosomal protein L17-2 OS=Arabidopsis thaliana GN=RPL17B PE=2 SV=2	60S ribosomal protein L17-2-like; K02880 large subunit ribosomal protein L17e
blue	CL9718.Contig2_All	172.024	gi|593332311|hypothetical protein PHAVU_008G041700g	gi|349730590|Vitis vinifera clone SS0AEB21YD07	60S ribosomal protein L34 OS=Pisum sativum GN=RPL34 PE=2 SV=1	60S ribosomal protein L34; K02915 large subunit ribosomal protein L34e
blue	CL7094.Contig1_All	243.362	gi|297735234|unnamed protein product	gi|330318489|Camellia sinensis clone U10BcDNA 1473	60S ribosomal protein L38 OS=Arabidopsis thaliana GN=RPL38A PE=3 SV=1	60S ribosomal protein L38; K02923 large subunit ribosomal protein L38e
blue	Unigene11075_All	194.222	gi|629122004|hypothetical protein EUGRSUZ_B03153	gi|330318570|Camellia sinensis clone U10BCDNA 0784 ribosomal protein L39e mRNA	60S ribosomal protein L39-3 OS=Oryza sativa subsp. japonica GN=RPL39C PE=3 SV=1	60S ribosomal protein L39-3-like; K02924 large subunit ribosomal protein L39e
blue	Unigene16165_All	205.036	gi|590587045|1.33573e-28/Aceous RNase P 3 isoform 1	gi|590587044|Theobroma cacao Aceous RNase P 3 isoform 1	Proteinaceous RNase P 2 OS=Arabidopsis thaliana GN=PRORP2 PE=1 SV=1	Aceous RNase P 3 isoform 1; K18213 proteinaceous RNase P [EC:3.1.26.5]
blue	CL6802.Contig1_All	163.223	gi|596162807|hypothetical protein PRUPE_ppa008849mg	gi|590666545|Theobroma cacao Annexin 5 isoform 1 (TCM_013176) mRNA, complete cds	Annexin D5 OS=Arabidopsis thaliana GN=ANN5 PE=2 SV=2	annexin D5-like; K17095 annexin A7
blue	CL6380.Contig2_All	193.338	gi|565384762|PREDICTED: BRCA1-associated protein-like	gi|566149161|Populus trichocarpa dual specificity protein phosphatase	Proline-rich receptor-like protein kinase PERK1 OS=Arabidopsis thaliana GN=PERK1 PE=2 SV=1	BRCA1-associated protein; K10632 BRCA1-associated protein [EC:2.3.2.27]
blue	CL1873.Contig7_All	257.837	gi|629103163|hypothetical protein EUGRSUZ_F022372, partial	gi|225458875|PREDICTED: Vitis vinifera calcium-transporting ATPase 3, endoplasmic reticulum-type-like	Calcium-transporting ATPase 3, endoplasmic reticulum-type OS=Arabidopsis thaliana GN=ECA3 PE=2 SV=3	calcium-transporting ATPase 3, endoplasmic reticulum-type; K05853 Ca2+ transporting ATPase, sarcoplasmic
blue	CL10507.Contig3_All	187.634	gi|PREDICTED: callose synthase 10-like	gi|566206860|Populus trichocarpa GLUCAN SYNTHASE-LIKE 8 family protein	Callose synthase 10 OS=Arabidopsis thaliana GN=CALS10 PE=2 SV=5	callose synthase 10; K11000 callose synthase [EC:2.4.1.-]
blue	CL954.Contig5_All	251.646	gi|297734197|unnamed protein product	gi|225455919|PREDICTED: Vitis vinifera carbon catabolite repressor protein 4 homolog 5-like	Carbon catabolite repressor protein 4 homolog 5 OS=Arabidopsis thaliana GN=CCR4-5 PE=2 SV=2	carbon catabolite repressor protein 4 homolog 5; K18729 protein angel
blue	CL215.Contig5_All	246.326	gi|590720879|CBL-interacting protein kinase 9	gi|590720878|Theobroma cacao CBL-interacting protein kinase 9	CBL-interacting serine	CBL-interacting serine
blue	Unigene21753_All	172.767	gi|297745925|unnamed protein product	gi|470119284|PREDICTED: Fragaria vesca subsp. vesca cell division control protein 6 homolog	NA	cell division control protein 6 homolog; K02213 cell division control protein 6
blue	CL6097.Contig2_All	266.589	gi|587921740|hypothetical protein L484_005105	gi|565352085|PREDICTED: Solanum tuberosum chaperonin CPN60-like 2, mitochondrial-like	Chaperonin CPN60-like 2, mitochondrial OS=Arabidopsis thaliana GN=At3g13860 PE=2 SV=2	chaperonin CPN60-like 2, mitochondrial-like; K04077 chaperonin GroEL
blue	CL6097.Contig3_All	204.988	gi|571464281|PREDICTED: chaperonin CPN60-like 2, mitochondrial-like	gi|359482517|PREDICTED: Vitis vinifera uncharacterized LOC100266920	Chaperonin CPN60-like 2, mitochondrial OS=Arabidopsis thaliana GN=At3g13860 PE=2 SV=2	chaperonin CPN60-like 2, mitochondrial-like; K04077 chaperonin GroEL
blue	CL10616.Contig2_All	213.115	gi|629084218|hypothetical protein EUGRSUZ_J00289	gi|568864161|PREDICTED: Citrus sinensis charged multivesicular body protein 5-like	NA	charged multivesicular body protein 5; K12198 charged multivesicular body protein 5
blue	CL10616.Contig1_All	261.624	gi|449434524|PREDICTED: charged multivesicular body protein 5-like	gi|359487022|PREDICTED: Vitis vinifera charged multivesicular body protein 5-like	NA	charged multivesicular body protein 5-like; K12198 charged multivesicular body protein 5
blue	CL1880.Contig10_All	233.963	gi|255560273|conserved hypothetical protein	gi|359480343|PREDICTED: Vitis vinifera CLIP-associating protein-like	CLIP-associated protein OS=Arabidopsis thaliana GN=CLASP PE=1 SV=1	CLIP-associated protein; K16578 CLIP-associating protein 1
blue	CL11054.Contig1_All	231.639	gi|470141984|PREDICTED: common plant regulatory factor 1-like	NA	Common plant regulatory factor 1 OS=Petroselinum crispum GN=CPRF1 PE=2 SV=1	common plant regulatory factor 1-like; K09060 plant G-box-binding factor
blue	CL2656.Contig1_All	225.23	gi|225435729|PREDICTED: glucan endo-1,3-beta-glucosidase 4-like	gi|PREDICTED: Vitis vinifera glucan endo-1,3-beta-glucosidase 4-like	Constitutive photomorphogenesis protein 10 OS=Arabidopsis thaliana GN=COP10 PE=1 SV=1	constitutive photomorphogenesis protein 10; K06689 ubiquitin-conjugating enzyme E2 D
blue	CL4556.Contig2_All	229.629	gi|629083561|hypothetical protein EUGRSUZ_K03458	gi|PREDICTED: Vitis vinifera dephospho-CoA kinase domain-containing protein-like	Dephospho-CoA kinase OS=Arabidopsis thaliana GN=COAE PE=2 SV=1	dephospho-CoA kinase; K00859 dephospho-CoA kinase [EC:2.7.1.24]
blue	CL991.Contig4_All	162.448	gi|359477080|PREDICTED: uncharacterized protein LOC100253902	gi|359477079|PREDICTED: Vitis vinifera uncharacterized LOC100253902	DNA mismatch repair protein MLH3 OS=Arabidopsis thaliana GN=MLH3 PE=2 SV=2	DNA mismatch repair protein MLH3; K08739 DNA mismatch repair protein MLH3
blue	Unigene1959_All	193.063	gi|225435468|PREDICTED: uncharacterized RNA-binding protein C23E6.01c-like isoform 1	gi|359487389|PREDICTED: Vitis vinifera DNA topoisomerase 2-like	Polyadenylate-binding protein RBP47B' OS=Arabidopsis thaliana GN=RBP47B' PE=2 SV=1	DNA topoisomerase 2; K03164 DNA topoisomerase II [EC:5.99.1.3]
blue	CL675.Contig3_All	230.492	gi|255555519|Coiled-coil domain-containing protein, putative	gi|Vitis vinifera clone SS0ACG1YB21	NA	DUF572-domain-containing protein; K13115 coiled-coil domain-containing protein 130
blue	CL10479.Contig2_All	198.113	gi|225432562|PREDICTED: E3 ubiquitin-protein ligase RHF1A	gi|359477492|PREDICTED: Vitis vinifera E3 ubiquitin-protein ligase RHF1A-like	E3 ubiquitin-protein ligase RHF1A OS=Arabidopsis thaliana GN=RHF1A PE=1 SV=1	E3 ubiquitin-protein ligase RHF1A; K19043 E3 ubiquitin-protein ligase RHF [EC:2.3.2.27]
blue	CL329.Contig6_All	290.824	gi|565351220|PREDICTED: enoyl-CoA hydratase 2, peroxisomal-like	gi|349711106|Vitis vinifera clone SS0AEB15YM20	Enoyl-CoA hydratase 2, peroxisomal OS=Arabidopsis thaliana GN=ECH2 PE=1 SV=1	enoyl-CoA hydratase 2, peroxisomal-like; K19658 peroxisomal enoyl-CoA hydratase 2 [EC:4.2.1.119]
blue	CL7610.Contig3_All	245.643	gi|225451754|PREDICTED: eukaryotic translation initiation factor 3 subunit M	gi|225451753|PREDICTED: Vitis vinifera eukaryotic translation initiation factor 3 subunit M-like	NA	eukaryotic translation initiation factor 3 subunit M; K15030 translation initiation factor 3 subunit M
blue	Unigene11515_All	222.603	gi|359495228|PREDICTED: uncharacterized protein LOC100253453	gi|PREDICTED: Vitis vinifera endoplasmic reticulum-Golgi intermediate compartment protein 3-like	Glutenin, high molecular weight subunit PW212 OS=Triticum aestivum PE=3 SV=1	far upstream element-binding protein 1; K13210 far upstream element-binding protein
blue	CL5957.Contig1_All	192.159	gi|470101239|PREDICTED: leucine-rich repeat extensin-like protein 4-like	gi|302809917|Selaginella moellendorffii hypothetical protein	Formin-like protein 3 OS=Oryza sativa subsp. japonica GN=FH3 PE=2 SV=2	formin-like protein 20; K02184 formin 2
blue	CL5747.Contig2_All	161.968	gi|587948083|PIN2/TERF1-interacting telomerase inhibitor 1	gi|590678620|Theobroma cacao D111/G-patch domain-containing protein isoform 3	DNA-directed RNA polymerases II, IV and V subunit 3 OS=Arabidopsis thaliana GN=NRPB3 PE=1 SV=1	G patch domain-containing protein 4; K11135 Pin2-interacting protein X1
blue	CL1576.Contig2_All	200.416	gi|590632084|GCN5-related N-acetyltransferase	gi|568856405|PREDICTED: Citrus sinensis glucosamine 6-phosphate N-acetyltransferase-like	Glucosamine 6-phosphate N-acetyltransferase OS=Arabidopsis thaliana GN=GNA1 PE=1 SV=1	GCN5-related N-acetyltransferase; K00621 glucosamine-phosphate N-acetyltransferase [EC:2.3.1.4]
blue	Unigene8111_All	207.159	gi|24963931|phytochelatin synthase	NA	Glutathione gamma-glutamylcysteinyltransferase 3 OS=Lotus japonicus GN=PCS3 PE=2 SV=1	glutathione gamma-glutamylcysteinyltransferase 1-like; K05941 glutathione gamma-glutamylcysteinyltransferase [EC:2.3.2.15]
blue	CL10941.Contig2_All	165.317	gi|388499778|	gi|571566345|PREDICTED: Glycine max uncharacterized	Glyoxylate	glyoxylate
blue	CL940.Contig4_All	283.473	gi|604311899|hypothetical protein MIMGU_mgv1a018772mg, partial	gi|460382954|PREDICTED: Solanum lycopersicum uncharacterized	Probable serine	HORMA domain-containing protein 1; K17616 CTD small phosphatase-like protein 2 [EC:3.1.3.-]
blue	CL269.Contig1_All	295.909	gi|359486873|PREDICTED: shugoshin-1-like	gi|147788941|Vitis vinifera contig VV78X065147.14, whole genome shotgun sequence	Hydroxymethylglutaryl-CoA lyase, mitochondrial OS=Arabidopsis thaliana GN=HMGCL PE=1 SV=2	hydroxymethylglutaryl-CoA lyase, mitochondrial-like; K01640 hydroxymethylglutaryl-CoA lyase [EC:4.1.3.4]
blue	CL5926.Contig1_All	290.184	gi|297738669|unnamed protein product	gi|519684777|Gossypium hirsutum clone NBRI_GE10744 microsatellite sequence	NA	hypothetical protein; K14818 ribosome assembly protein SQT1
blue	CL5949.Contig3_All	243.811	gi|590647325|DCD domain protein isoform 1	gi|590647327|Theobroma cacao DCD domain protein isoform 1	B2 protein OS=Daucus carota PE=2 SV=1	kelch-like protein 5; K10442 kelch-like protein 1
blue	CL1506.Contig3_All	271.259	gi|595829244|hypothetical protein PRUPE_ppa011023mg	gi|359479354|PREDICTED: Vitis vinifera lactoylglutathione lyase-like, transcript variant 1	Lactoylglutathione lyase OS=Cicer arietinum PE=2 SV=1	lactoylglutathione lyase; K01759 lactoylglutathione lyase [EC:4.4.1.5]
blue	CL1616.Contig11_All	211.352	gi|192764525|	gi|349719009|Vitis vinifera clone SS0AFA5YE13	NA	long chain base biosynthesis protein 2a-like; K00654 serine palmitoyltransferase [EC:2.3.1.50]
blue	CL572.Contig1_All	244.74	gi|255574385|mitochondrial inner membrane protease subunit, putative	gi|225440671|PREDICTED: Vitis vinifera mitochondrial inner membrane protease subunit 2-like	Probable thylakoidal processing peptidase 2, chloroplastic OS=Arabidopsis thaliana GN=TPP2 PE=2 SV=1	mitochondrial inner membrane protease subunit 2; K09648 mitochondrial inner membrane protease subunit 2 [EC:3.4.21.-]
blue	CL9157.Contig1_All	234.712	gi|586742339|hypothetical protein AMTR_s00165p00068240	gi|147768076|Vitis vinifera contig VV78X193742.9, whole genome shotgun sequence	Adenine nucleotide transporter BT1, chloroplastic	mitochondrial substrate carrier family protein B; K14684 solute carrier family 25 (mitochondrial phosphate transporter), member 23
blue	CL1230.Contig2_All	288.602	gi|1632831|	gi|460397453|PREDICTED: Solanum lycopersicum multiprotein-bridging factor 1b-like	Multiprotein-bridging factor 1b OS=Arabidopsis thaliana GN=MBF1B PE=2 SV=1	Multiprotein bridging factor 1B; K03627 putative transcription factor
blue	CL1230.Contig1_All	279.015	gi|1632831|	gi|565386234|PREDICTED: Solanum tuberosum multiprotein-bridging factor 1b-like	Multiprotein-bridging factor 1b OS=Arabidopsis thaliana GN=MBF1B PE=2 SV=1	Multiprotein bridging factor 1B; K03627 putative transcription factor
blue	CL11923.Contig2_All	212.59	gi|567902798|hypothetical protein CICLE_v10019816mg	gi|568851788|PREDICTED: Citrus sinensis transcription factor bHLH3-like	Transcription factor bHLH3 OS=Arabidopsis thaliana GN=BHLH3 PE=2 SV=1	myc7; myc transcription factor7; K13422 transcription factor MYC2
blue	CL1079.Contig7_All	307.444	gi|567918410|hypothetical protein CICLE_v10008139mg	gi|225445177|PREDICTED: Vitis vinifera NADPH:adrenodoxin oxidoreductase, mitochondrial-like	NA	NADPH:adrenodoxin oxidoreductase, mitochondrial-like; K18914 adrenodoxin-NADP+ reductase [EC:1.18.1.6]
blue	CL12049.Contig2_All	207.402	gi|296082895|unnamed protein product	gi|359488911|PREDICTED: Vitis vinifera protein SET-like	NAP1-related protein 1 OS=Arabidopsis thaliana GN=NRP1 PE=1 SV=1	NAP1-related protein 2; K11290 template-activating factor I
blue	CL3054.Contig2_All	188.418	gi|296085640|2.72207e-21/unnamed protein product	gi|225469164|PREDICTED: Vitis vinifera uncharacterized	Nuclear transcription factor Y subunit A-6 OS=Arabidopsis thaliana GN=NFYA6 PE=2 SV=1	nuclear transcription factor Y subunit A-3-like; K08064 nuclear transcription factor Y, alpha
blue	Unigene3606_All	189.562	gi|225458581|PREDICTED: origin recognition complex subunit 2-like	gi|470109680|PREDICTED: Fragaria vesca subsp. vesca origin recognition complex subunit 2-like	Origin recognition complex subunit 2 OS=Arabidopsis thaliana GN=ORC2 PE=1 SV=1	origin recognition complex subunit 2; K02604 origin recognition complex subunit 2
blue	Unigene11531_All	174.857	gi|115457406|	gi|449520558|PREDICTED: Cucumis sativus uncharacterized	NA	Os04g0244500; K09142 uncharacterized protein
blue	Unigene12802_All	272.6	gi|566155323|hypothetical protein POPTR_0001s47130g	gi|225462014|PREDICTED: Vitis vinifera probable peptidyl-prolyl cis-trans isomerase C27F1.06c-like	Peptidyl-prolyl cis-trans isomerase FKBP16-1, chloroplastic OS=Arabidopsis thaliana GN=FKBP16-1 PE=2 SV=1	peptidyl-prolyl cis-trans isomerase FKBP53; K14826 FK506-binding nuclear protein [EC:5.2.1.8]
blue	Unigene21423_All	193.452	gi|356512501|PREDICTED: peptidyl-tRNA hydrolase, mitochondrial isoform X1	gi|359478794|PREDICTED: Vitis vinifera peptidyl-tRNA hydrolase, mitochondrial-like	Peptidyl-tRNA hydrolase, mitochondrial OS=Arabidopsis thaliana GN=At5g19830 PE=2 SV=1	peptidyl-tRNA hydrolase, mitochondrial-like; K01056 peptidyl-tRNA hydrolase, PTH1 family [EC:3.1.1.29]
blue	Unigene12361_All	173.283	gi|593789822|hypothetical protein PHAVU_002G111800g	NA	NA	peroxidase 27-like; K00430 peroxidase [EC:1.11.1.7]
blue	Unigene15883_All	278.362	gi|255554260|Inhibitor of growth protein, putative	gi|566202636|Populus trichocarpa Casein kinase II beta-3 subunit family protein	Casein kinase II subunit beta OS=Arabidopsis thaliana GN=CKB1 PE=1 SV=1	PHD finger protein ING1; K11346 inhibitor of growth protein 4
blue	CL1627.Contig3_All	288.502	gi|225423593|PREDICTED: mitochondrial translocator assembly and maintenance protein 41 homolog	gi|225423592|PREDICTED: Vitis vinifera mitochondrial translocator assembly and maintenance protein 41 homolog-like	NA	phosphatidate cytidylyltransferase, mitochondrial; K17807 mitochondrial translocator assembly and maintenance protein 41
blue	Unigene29710_All	186.659	gi|470105727|PREDICTED: probable phosphoglycerate mutase GpmB-like	gi|349703421|Vitis vinifera clone SS0ABG21YA14	NA	phosphoglycerate mutase-like protein 4; K15634 probable phosphoglycerate mutase [EC:5.4.2.12]
blue	CL956.Contig1_All	171.135	gi|356572504|PREDICTED: polyadenylate-binding protein 7-like	gi|225441083|PREDICTED: Vitis vinifera probable polyadenylate-binding protein At2g36660-like	Polyadenylate-binding protein 7 OS=Arabidopsis thaliana GN=PAB7 PE=2 SV=1	polyadenylate-binding protein 7-like; K13126 polyadenylate-binding protein
blue	Unigene19350_All	171.417	gi|157169069|starch synthase isoform II	gi|157169068|Manihot esculenta starch synthase isoform II (SSII)	Granule-bound starch synthase 2, chloroplastic	POPTRDRAFT_1105268; glycogen synthase family protein; K00703 starch synthase [EC:2.4.1.21]
blue	CL133.Contig2_All	203.798	gi|225427562|PREDICTED: uncharacterized protein LOC100242504	gi|225427561|PREDICTED: Vitis vinifera uncharacterized LOC100242504	17.9 kDa class II heat shock protein OS=Glycine max GN=HSP17.9-D PE=3 SV=1	POPTRDRAFT_832078; heat shock protein 17.7; K13993 HSP20 family protein
blue	CL763.Contig3_All	162.848	gi|565378734|PREDICTED: pre-mRNA-splicing factor SF2-like	gi|460403893|PREDICTED: Solanum lycopersicum pre-mRNA-splicing factor SF2-like, transcript variant 2	Pre-mRNA-splicing factor SF2 OS=Arabidopsis thaliana GN=SF2 PE=1 SV=1	pre-mRNA-splicing factor SF2-like; K12890 splicing factor, arginine
blue	Unigene5402_All	161.125	gi|590704747|Centrin2 isoform 1	gi|590704746|Theobroma cacao Centrin2 isoform 1 (TCM_000608) mRNA, complete cds	Probable calcium-binding protein CML20 OS=Arabidopsis thaliana GN=CML20 PE=1 SV=1	probable calcium-binding protein CML20; K13448 calcium-binding protein CML
blue	CL6752.Contig5_All	204.58	gi|359492139|PREDICTED: probable methyltransferase PMT26-like	gi|359492138|PREDICTED: Vitis vinifera probable methyltransferase PMT26-like	Probable methyltransferase PMT24 OS=Arabidopsis thaliana GN=At1g29470 PE=2 SV=1	probable methyltransferase PMT28; K16302 metal transporter CNNM
blue	Unigene10752_All	253.624	gi|225455537|PREDICTED: probable receptor-like protein kinase At1g67000-like	gi|359495101|PREDICTED: Vitis vinifera probable receptor-like protein kinase At1g67000-like	Probable receptor-like protein kinase At5g39020 OS=Arabidopsis thaliana GN=At5g39020 PE=2 SV=1	probable receptor-like protein kinase At5g39020; K04730 interleukin-1 receptor-associated kinase 1 [EC:2.7.11.1]
blue	CL7949.Contig1_All	214.56	gi|571469078|uncharacterized protein LOC100799108 isoform X2	gi|568842830|PREDICTED: Citrus sinensis proteasome subunit alpha type-2-A-like	Proteasome subunit alpha type-2 OS=Oryza sativa subsp. japonica GN=PAB1 PE=2 SV=1	proteasome subunit alpha type-2-A-like; K02726 20S proteasome subunit alpha 2 [EC:3.4.25.1]
blue	CL1175.Contig1_All	268.138	gi|567874725|hypothetical protein CICLE_v10013867mg	gi|568856229|PREDICTED: Citrus sinensis protein RRP5 homolog	NA	protein RRP5 homolog; K14792 rRNA biogenesis protein RRP5
blue	CL12109.Contig2_All	238.129	gi|255570958|protein with unknown function	gi|349718042|Vitis vinifera clone SS0AEB27YD16	Ras-related protein RABD1 OS=Arabidopsis thaliana GN=RABD1 PE=1 SV=1	ras-related protein RABD1; K07874 Ras-related protein Rab-1A
blue	CL4404.Contig1_All	169.216	gi|593784383|hypothetical protein PHAVU_003G184400g	NA	Replication protein A 70 kDa DNA-binding subunit B OS=Oryza sativa subsp. japonica GN=RPA1B PE=1 SV=1	replication protein A 70 kDa DNA-binding subunit B-like; K07466 replication factor A1
blue	CL6708.Contig1_All	235.484	gi|297735490|unnamed protein product	gi|590630476|Theobroma cacao PLAC8 family protein isoform 2	Cell number regulator 8 OS=Zea mays GN=CNR8 PE=2 SV=1	Sec23
blue	CL10239.Contig1_All	161.395	gi|225451011|PREDICTED: signal peptidase complex subunit 3B	gi|225451010|PREDICTED: Vitis vinifera signal peptidase complex subunit 3B-like	Signal peptidase complex subunit 3B OS=Arabidopsis thaliana GN=At5g27430 PE=2 SV=1	signal peptidase complex subunit 3B; K12948 signal peptidase complex subunit 3 [EC:3.4.-.-]
blue	Unigene17269_All	224.145	gi|296087401|unnamed protein product	gi|PREDICTED: Vitis vinifera small RNA degrading nuclease 3-like	NA	small RNA degrading nuclease 1-like; K14570 RNA exonuclease 1 [EC:3.1.-.-]
blue	CL2416.Contig15_All	161.422	gi|590565419|Splicing factor U2af large subunit A isoform 1	gi|349704306|Vitis vinifera clone SS0AFA1YD06	Splicing factor U2af large subunit B OS=Nicotiana plumbaginifolia GN=U2AF65B PE=2 SV=1	Splicing factor U2af large subunit A isoform 1; K12837 splicing factor U2AF 65 kDa subunit
blue	CL2416.Contig16_All	217.379	gi|255568277|splicing factor u2af large subunit, putative	gi|Vitis vinifera clone SS0AFA1YD06	Splicing factor U2af large subunit B OS=Nicotiana plumbaginifolia GN=U2AF65B PE=2 SV=1	splicing factor U2af large subunit B; K12837 splicing factor U2AF 65 kDa subunit
blue	CL5647.Contig1_All	230.108	gi|595808479|hypothetical protein PRUPE_ppa013476mg	gi|Hevea brasiliensis thioredoxin H-type 5 (TrxH5) mRNA, complete cds	Thioredoxin H1 OS=Arabidopsis thaliana GN=TRX1 PE=1 SV=1	thioredoxin H-type; K03671 thioredoxin 1
blue	CL9987.Contig1_All	251.017	gi|225453197|PREDICTED: THO complex subunit 4	gi|123696721|Vitis vinifera contig VV78X084883.6, whole genome shotgun sequence	THO complex subunit 4D OS=Arabidopsis thaliana GN=ALY4 PE=1 SV=1	THO complex subunit 4D; K12881 THO complex subunit 4
blue	CL8996.Contig2_All	218.637	gi|255582255|RNA and export factor binding protein, putative	gi|PREDICTED: Citrus sinensis THO complex subunit 4-like	THO complex subunit 4C OS=Arabidopsis thaliana GN=ALY3 PE=1 SV=1	THO complex subunit 4D; K12881 THO complex subunit 4
blue	CL7738.Contig3_All	338.116	gi|568825328|PREDICTED: transformer-2 protein homolog beta-like	gi|502161497|PREDICTED: Cicer arietinum serine/arginine-rich splicing factor 4-like	NA	transformer-2 protein homolog beta-like; K12897 transformer-2 protein
blue	CL1083.Contig1_All	164.464	gi|590670529|Translocase inner membrane subunit 8	gi|359491115|PREDICTED: Vitis vinifera mitochondrial import inner membrane translocase subunit Tim8-like	NA	Translocase inner membrane subunit 8; K17780 mitochondrial import inner membrane translocase subunit TIM8
blue	CL8177.Contig6_All	165.964	gi|590684075|Transportin 1 isoform 1	gi|590684074|Theobroma cacao Transportin 1 isoform 1	Transportin-1 OS=Oryza sativa subsp. japonica GN=TRN1 PE=3 SV=2	transportin-1; K18752 transportin-1
blue	CL797.Contig4_All	248.639	gi|590718087|Oxidoreductase, aldo/keto reductase family protein, expressed isoform 1	gi|590718115|1e-16/Theobroma cacao NAD(P)-linked oxidoreductase superfamily protein isoform 4	Tubulin beta-1 chain OS=Arabidopsis thaliana GN=TUBB1 PE=2 SV=1	tubulin beta chain-like; K07375 tubulin beta
blue	Unigene19875_All	163.198	gi|629092180|hypothetical protein EUGRSUZ_H00892	gi|359480212|PREDICTED: Vitis vinifera ubiquitin-40S ribosomal protein S27a-like, transcript variant 2	Ubiquitin-40S ribosomal protein S27a OS=Solanum tuberosum GN=UBI3 PE=2 SV=2	ubiquitin-40S ribosomal protein S27a-like; K02977 small subunit ribosomal protein S27Ae
blue	Unigene12819_All	260.83	gi|590632334|Ubiquitin extension protein 1 isoform 1	gi|359482014|PREDICTED: Vitis vinifera ubiquitin-60S ribosomal protein L40-like	Ubiquitin-60S ribosomal protein L40 OS=Nicotiana sylvestris GN=UBICEP52-7 PE=2 SV=2	ubiquitin-60S ribosomal protein L40; K02927 large subunit ribosomal protein L40e
blue	CL7502.Contig2_All	242.26	gi|225456323|PREDICTED: ubiquitin-like modifier-activating enzyme 5 isoform 1	gi|225456322|PREDICTED: Vitis vinifera ubiquitin-like modifier-activating enzyme 5	Ubiquitin-like modifier-activating enzyme 5 OS=Arabidopsis thaliana GN=At1g05350 PE=3 SV=2	ubiquitin-like modifier-activating enzyme 5; K12164 ubiquitin-like modifier-activating enzyme 5
blue	CL5206.Contig4_All	268.574	gi|590594714|Ubiquitin-like superfamily protein isoform 1	gi|30680467|Arabidopsis thaliana ubiquitin-like superfamily protein	NA	Ubiquitin-like superfamily protein isoform 1; K13153 U11
blue	CL5367.Contig2_All	274.888	gi|566204399|hypothetical protein POPTR_0014s15210g, partial	gi|359485482|PREDICTED: Vitis vinifera autophagy-related protein 8C-like, transcript variant 1	Autophagy-related protein 8C OS=Oryza sativa subsp. japonica GN=ATG8C PE=2 SV=1	Ubiquitin-like superfamily protein; K08341 GABA(A) receptor-associated protein
blue	Unigene15989_All	254.62	gi|225447868|PREDICTED: uncharacterized protein LOC100267427 isoform 2	gi|225447869|PREDICTED: Vitis vinifera uncharacterized LOC100267427, transcript variant 1	NA	uncharacterized LOC100267427; K12456 anaphase-promoting complex subunit 13
blue	CL3777.Contig6_All	299.678	gi|565382298|PREDICTED: transcription factor SPT20 homolog	gi|565382297|PREDICTED: Solanum tuberosum transcription factor SPT20 homolog	NA	uncharacterized LOC101785211; K16903 L-tryptophan---pyruvate aminotransferase [EC:2.6.1.99]
blue	CL11360.Contig1_All	231.14	gi|414873565|TPA: hypothetical protein ZEAMMB73_573370	NA	NA	uncharacterized LOC102625866; K04077 chaperonin GroEL
blue	CL1544.Contig4_All	258.324	gi|460380072|PREDICTED: Down syndrome critical region protein 3-like	gi|359491031|PREDICTED: Vitis vinifera Down syndrome critical region protein 3 homolog	Uncharacterized protein At3g06530 OS=Arabidopsis thaliana GN=At3g06530 PE=1 SV=3	uncharacterized LOC102629141; K14550 U3 small nucleolar RNA-associated protein 10
blue	CL1544.Contig1_All	243.967	gi|604304926|hypothetical protein MIMGU_mgv1a012608mg	gi|359491031|PREDICTED: Vitis vinifera Down syndrome critical region protein 3 homolog	Uncharacterized protein At3g06530 OS=Arabidopsis thaliana GN=At3g06530 PE=1 SV=3	uncharacterized LOC102629141; K14550 U3 small nucleolar RNA-associated protein 10
blue	Unigene17281_All	229.447	gi|147780251|hypothetical protein VITISV_037761	gi|Vitis vinifera contig VV78X127711.9, whole genome shotgun sequence	NA	uncharacterized LOC103344504; K17604 zinc finger SWIM domain-containing protein 3
blue	CL6678.Contig19_All	233.786	gi|460388468|PREDICTED: squamosa promoter-binding-like protein 12-like	gi|565378548|PREDICTED: Solanum tuberosum squamosa promoter-binding-like protein 12-like	Squamosa promoter-binding-like protein 1 OS=Arabidopsis thaliana GN=SPL1 PE=1 SV=2	uncharacterized LOC104427482; K14794 ribosomal RNA-processing protein 12
blue	CL11536.Contig2_All	264.75	gi|296086038|unnamed protein product	gi|359486522|PREDICTED: Vitis vinifera uncharacterized	Probable E3 ubiquitin-protein ligase HIP1 OS=Oryza sativa subsp. japonica GN=HIP1 PE=1 SV=2	uncharacterized LOC105645493; K10635 E3 ubiquitin-protein ligase Arkadia [EC:2.3.2.27]
blue	Unigene10961_All	230.484	gi|566199841|hypothetical protein POPTR_0013s06690g	gi|PREDICTED: Solanum tuberosum UTP--glucose-1-phosphate uridylyltransferase-like	UTP--glucose-1-phosphate uridylyltransferase OS=Astragalus penduliflorus GN=UGP PE=1 SV=1	UTP--glucose-1-phosphate uridylyltransferase-like; K00963 UTP--glucose-1-phosphate uridylyltransferase [EC:2.7.7.9]
blue	CL6431.Contig1_All	197.243	gi|590629642|I-branching beta-1,6-N-acetylglucosaminyltransferase family protein	gi|225440331|PREDICTED: Vitis vinifera xylosyltransferase 2-like	NA	xylosyltransferase 2; K00771 protein xylosyltransferase [EC:2.4.2.26]
blue	CL10713.Contig2_All	204.029	gi|590689679|Zinc-binding ribosomal family protein	gi|359487289|PREDICTED: Vitis vinifera 60S ribosomal protein L44-like	60S ribosomal protein L44 OS=Gossypium hirsutum GN=RPL44 PE=3 SV=3	Zinc-binding ribosomal family protein; K02929 large subunit ribosomal protein L44e
blue	Unigene50900_All	178.758	gi|225441825|PREDICTED: zinc-metallopeptidase, peroxisomal	NA	Zinc-metallopeptidase, peroxisomal OS=Arabidopsis thaliana GN=PXM16 PE=2 SV=1	zinc-metallopeptidase, peroxisomal; K01408 insulysin [EC:3.4.24.56]
blue	CL4408.Contig3_All	288.643	NA	NA	NA	NA
blue	CL7639.Contig1_All	283.251	NA	NA	NA	NA
blue	CL6637.Contig2_All	280.677	NA	NA	NA	NA
blue	CL5325.Contig1_All	279.307	NA	NA	NA	NA
blue	CL10683.Contig1_All	277.386	NA	NA	NA	NA
blue	Unigene13505_All	253.595	gi|460399920|PREDICTED: protein NLP7-like	NA	NA	NA
blue	CL12114.Contig1_All	252.507	NA	gi|393715564|Camellia sinensis DNA, SSR marker	NA	NA
blue	Unigene11405_All	245.429	gi|566212140|hypothetical protein POPTR_0017s08260g	gi|571546455|PREDICTED: Glycine max uncharacterized LOC100305502	NA	NA
blue	CL4100.Contig2_All	243.986	NA	NA	NA	NA
blue	CL6133.Contig2_All	243.33	gi|590676947|NADH dehydrogenase 1 beta subcomplex subunit 8	gi|590676946|Theobroma cacao NADH dehydrogenase 1 beta subcomplex subunit 8 (TCM_016000)	NADH dehydrogenase [ubiquinone] 1 beta subcomplex subunit 8, mitochondrial OS=Arabidopsis thaliana GN=At5g47570 PE=2 SV=1	NA
blue	CL3060.Contig1_All	242.72	NA	NA	NA	NA
blue	CL3817.Contig2_All	242.02	NA	NA	NA	NA
blue	CL11373.Contig2_All	234.299	NA	gi|147789532|Vitis vinifera contig VV78X136126.9, whole genome shotgun sequence	NA	NA
blue	CL8857.Contig1_All	233.576	NA	NA	NA	NA
blue	CL10178.Contig1_All	224.166	gi|225435317|PREDICTED: uncharacterized protein LOC100263969	gi|Theobroma cacao Uncharacterized protein (TCM_042050)	NA	NA
blue	CL8864.Contig1_All	223.949	NA	NA	NA	NA
blue	CL4712.Contig1_All	223.067	gi|359473770|PREDICTED: uncharacterized protein LOC100260846 isoform 1	gi|Theobroma cacao Uncharacterized protein isoform 1	NA	NA
blue	CL4656.Contig1_All	221.512	NA	NA	NA	NA
blue	CL12133.Contig1_All	219.603	gi|302141726|unnamed protein product	NA	Pentatricopeptide repeat-containing protein At1g20230 OS=Arabidopsis thaliana GN=PCMP-H21 PE=2 SV=2	NA
blue	CL11769.Contig4_All	217.986	NA	NA	NA	NA
blue	CL9368.Contig1_All	214.907	NA	NA	NA	NA
blue	CL1809.Contig1_All	210.799	gi|255586104|conserved hypothetical protein	gi|590608579|Theobroma cacao Kinase family protein	Receptor-like protein kinase THESEUS 1 OS=Arabidopsis thaliana GN=THE1 PE=1 SV=1	NA
blue	Unigene4343_All	208.699	gi|567910167|hypothetical protein CICLE_v10018116mg	gi|155369348|Populus trichocarpa clone JGIACSB09-D05	NA	NA
blue	CL5066.Contig5_All	207.907	gi|359476835|PREDICTED: uncharacterized protein LOC100259067	gi|359476834|PREDICTED: Vitis vinifera uncharacterized	NA	NA
blue	CL8160.Contig1_All	205.963	NA	NA	NA	NA
blue	CL2687.Contig5_All	205.429	gi|571486148|PREDICTED: WD repeat-containing protein 91-like	gi|590673407|Theobroma cacao Transducin/WD40 repeat-like superfamily protein isoform 2	NA	NA
blue	Unigene51343_All	204.77	NA	NA	NA	NA
blue	Unigene12041_All	203.695	NA	NA	NA	NA
blue	Unigene15634_All	202.06	gi|568876061|PREDICTED: uncharacterized protein LOC102626074 isoform X1	gi|502105168|PREDICTED: Cicer arietinum uncharacterized	NA	NA
blue	Unigene1550_All	201.772	gi|567903182|hypothetical protein CICLE_v10023868mg	NA	NA	NA
blue	CL10163.Contig2_All	201.149	gi|565362022|PREDICTED: uncharacterized protein LOC102584732	gi|359480155|PREDICTED: Vitis vinifera uncharacterized	NA	NA
blue	CL888.Contig8_All	198.609	gi|225452382|PREDICTED: sirohydrochlorin ferrochelatase-like	gi|225452381|PREDICTED: Vitis vinifera sirohydrochlorin ferrochelatase-like	NA	NA
blue	CL6208.Contig1_All	194.41	NA	gi|147770445|Vitis vinifera contig VV78X249661.6, whole genome shotgun sequence	NA	NA
blue	CL6440.Contig1_All	193.652	NA	NA	NA	NA
blue	CL8591.Contig2_All	187.839	NA	NA	NA	NA
blue	CL186.Contig16_All	187.7	gi|PREDICTED: uncharacterized protein LOC101491850	gi|359474144|PREDICTED: Vitis vinifera uncharacterized	NA	NA
blue	Unigene9227_All	187.317	NA	gi|123717797|Vitis vinifera, whole genome shotgun sequence, contig VV78X266006.21, clone ENTAV 115	NA	NA
blue	Unigene22048_All	186.834	NA	gi|393716178|Camellia sinensis DNA, SSR marker, MSE0215	NA	NA
blue	CL9047.Contig6_All	186.505	NA	NA	NA	NA
blue	CL7532.Contig1_All	185.048	gi|225446443|PREDICTED: uncharacterized protein LOC100243665 isoform 1	gi|359485213|5e-30/PREDICTED: Vitis vinifera uncharacterized	NA	NA
blue	CL4610.Contig1_All	183.554	gi|225439466|PREDICTED: uncharacterized protein LOC10024708	gi|571466478|PREDICTED: Glycine max 227 kDa spindle- and centromere-associated protein-like	NA	NA
blue	Unigene22306_All	182.954	NA	gi|31158358|Oryza sativa Japonica Group genomic DNA, chromosome 6, clone:P0514G12	NA	NA
blue	CL624.Contig1_All	178.763	gi|359478151|PREDICTED: uncharacterized protein LOC100261223	NA	NA	NA
blue	CL10814.Contig2_All	177.947	gi|604342473|hypothetical protein MIMGU_mgv1a004471mg	gi|470121708|PREDICTED: Fragaria vesca subsp. vesca sugar transport protein 13-like	Sugar transport protein 13 OS=Arabidopsis thaliana GN=STP13 PE=1 SV=2	NA
blue	CL9154.Contig1_All	177.149	gi|596032308|hypothetical protein PRUPE_ppa022231mg	gi|359492325|PREDICTED: Vitis vinifera pentatricopeptide repeat-containing protein At1g76280-like	Pentatricopeptide repeat-containing protein At1g76280 OS=Arabidopsis thaliana GN=At1g76280 PE=2 SV=2	NA
blue	CL390.Contig2_All	177.136	NA	NA	NA	NA
blue	Unigene7214_All	176.398	NA	NA	NA	NA
blue	CL2607.Contig3_All	175.049	gi|357114314|PREDICTED: uncharacterized oxidoreductase At4g09670-like	gi|223948888|Zea mays full-length cDNA clone ZM_BFc0110P07	NA	NA
blue	CL5704.Contig4_All	174.647	NA	NA	NA	NA
blue	CL6568.Contig1_All	173.412	NA	gi|449518820|PREDICTED: Cucumis sativus ethylene-responsive transcription factor RAP2-4-like	NA	NA
blue	Unigene14557_All	171.885	gi|565388702|PREDICTED: uncharacterized protein LOC102579806	gi|565388701|PREDICTED: Solanum tuberosum uncharacterized	NA	NA
blue	Unigene15474_All	171.545	NA	NA	NA	NA
blue	Unigene21081_All	169.917	NA	NA	NA	NA
blue	CL2197.Contig2_All	169.833	NA	NA	NA	NA
blue	CL3223.Contig1_All	169.018	NA	NA	NA	NA
blue	CL7032.Contig2_All	168.336	gi|568873468|PREDICTED: uncharacterized protein LOC102626655 isoform X3	NA	NA	NA
blue	CL6542.Contig4_All	167.47	gi|590675828|Uncharacterized protein isoform 1	NA	NA	NA
blue	CL3466.Contig9_All	167.411	NA	NA	NA	NA
blue	CL3082.Contig1_All	165.214	NA	NA	NA	NA
blue	CL5676.Contig4_All	165.169	gi|565354628|PREDICTED: uncharacterized protein LOC102602686	gi|565354627|PREDICTED: Solanum tuberosum uncharacterized	NA	NA
blue	CL4100.Contig1_All	165.162	NA	NA	NA	NA
blue	Unigene51009_All	165.105	NA	NA	NA	NA
blue	Unigene2435_All	164.782	gi|460401909|PREDICTED: dolichyl-diphosphooligosaccharide--protein glycosyltransferase subunit 4A-like isoform 1	gi|568854296|PREDICTED: Citrus sinensis dolichyl-diphosphooligosaccharide--protein glycosyltransferase subunit 4A-like	Dolichyl-diphosphooligosaccharide--protein glycosyltransferase subunit 4A OS=Oryza sativa subsp. japonica GN=OST4A PE=3 SV=1	NA
blue	Unigene18737_All	162.808	gi|568842695|PREDICTED: uncharacterized protein LOC102626009	NA	NA	NA
green	Unigene12810_All	194.212	gi|590574933|ATP binding microtubule motor family protein isoform 2	gi|359484514|PREDICTED: Vitis vinifera uncharacterized	Kinesin-like protein NACK2 OS=Nicotiana tabacum GN=NACK2 PE=1 SV=1	ATP binding microtubule motor family protein isoform 1; K11498 centromeric protein E
green	Unigene12815_All	149.568	gi|565361632|PREDICTED: cell division cycle 20.1, cofactor of APC complex-like	gi|359489170|PREDICTED: Vitis vinifera anaphase-promoting complex subunit cdc20-like	Cell division cycle 20.2, cofactor of APC complex OS=Arabidopsis thaliana GN=CDC20-2 PE=1 SV=1	cell division cycle 20.1, cofactor of APC complex-like; K03363 cell division cycle 20, cofactor of APC complex
green	CL703.Contig2_All	191.528	gi|460409021|PREDICTED: uncharacterized protein LOC101259104	gi|571494223|3e-22/PREDICTED: Glycine max uncharacterized	Proline-rich receptor-like protein kinase PERK2 OS=Arabidopsis thaliana GN=PERK2 PE=2 SV=3	clathrin interactor EPSIN 1; K12471 epsin
green	Unigene10370_All	181.883	gi|566165576|hypothetical protein POPTR_0004s08390g	gi|568857125|PREDICTED: Citrus sinensis condensin complex subunit 3-like	NA	condensin complex subunit 3-like; K06678 condensin complex subunit 3
green	Unigene1564_All	142.476	gi|460374539|PREDICTED: CTD small phosphatase-like protein-like	gi|470148123|PREDICTED: Fragaria vesca subsp. vesca CTD small phosphatase-like protein-like	Mitochondrial import inner membrane translocase subunit TIM50 OS=Phytophthora infestans GN=TIM50 PE=2 SV=1	CTD small phosphatase-like protein; K15731 carboxy-terminal domain RNA polymerase II polypeptide A small phosphatase [EC:3.1.3.16]
green	CL4416.Contig3_All	215.987	gi|347361138|cyclin	gi|347361137|Camellia sinensis cyclin mRNA, complete cds	Cyclin-B2-4 OS=Arabidopsis thaliana GN=CYCB2-4 PE=2 SV=2	Cyclin B2,3 isoform 1; K05868 cyclin B
green	CL8792.Contig2_All	168.221	gi|302141779|emb|unnamed protein product	gi|225459630|PREDICTED: Vitis vinifera cyclin-A1-1-like	Cyclin-A1-1 OS=Arabidopsis thaliana GN=CYCA1-1 PE=1 SV=1	cyclin-A1-1-like; K06627 cyclin A
green	CL5374.Contig1_All	162.508	gi|225428885|PREDICTED: cyclin-D3-2-like	gi|359475427|PREDICTED: Vitis vinifera cyclin-D3-2-like	Cyclin-D3-1 OS=Arabidopsis thaliana GN=CYCD3-1 PE=1 SV=3	cyclin-D3-3; K14505 cyclin D3, plant
green	Unigene11014_All	204.068	gi|344221929|cyclin-dependent kinase	gi|344221928|Camellia sinensis cyclin-dependent kinase	Cyclin-dependent kinase B2-2 OS=Arabidopsis thaliana GN=CDKB2-2 PE=1 SV=2	cyclin-dependent kinase B2-1; K07760 cyclin-dependent kinase [EC:2.7.11.22]
green	Unigene20383_All	187.015	gi|590706494|Di-glucose binding protein with Kinesin motor domain isoform 3	gi|359495849|PREDICTED: Vitis vinifera uncharacterized	NA	Di-glucose binding protein with Kinesin motor domain isoform 1; K10406 kinesin family member C2
green	Unigene10758_All	141.239	gi|296082407|unnamed protein product	gi|359480800|PREDICTED: Vitis vinifera DNA polymerase alpha catalytic subunit-like	DNA polymerase alpha catalytic subunit OS=Oryza sativa subsp. japonica GN=Os01g0868300 PE=2 SV=2	DNA polymerase alpha catalytic subunit; K02320 DNA polymerase alpha subunit A [EC:2.7.7.7]
green	Unigene19822_All	161.608	gi|297740670|unnamed protein product	gi|225463457|PREDICTED: Vitis vinifera DNA replication licensing factor MCM3 homolog 1-like	DNA replication licensing factor MCM3 homolog 2 OS=Zea mays GN=ROA2 PE=2 SV=1	DNA replication licensing factor MCM3 homolog 2; K02541 DNA replication licensing factor MCM3 [EC:3.6.4.12]
green	Unigene18999_All	193.326	gi|225462994|PREDICTED: DNA replication licensing factor mcm5-A-like	gi|225462993|PREDICTED: Vitis vinifera DNA replication licensing factor mcm5-A-like	DNA replication licensing factor MCM5 OS=Oryza sativa subsp. japonica GN=MCM5 PE=2 SV=1	DNA replication licensing factor MCM5; K02209 DNA replication licensing factor MCM5 [EC:3.6.4.12]
green	Unigene12022_All	215.927	gi|225450069|PREDICTED: DNA topoisomerase 2-like	gi|359487389|PREDICTED: Vitis vinifera DNA topoisomerase 2-like	DNA topoisomerase 2 OS=Arabidopsis thaliana GN=TOP2 PE=2 SV=2	DNA topoisomerase 2; K03164 DNA topoisomerase II [EC:5.99.1.3]
green	CL5015.Contig1_All	152.503	gi|460413967|PREDICTED: dynein light chain LC6, flagellar outer arm-like	gi|330318486|Camellia sinensis clone U10BcDNA 2902	Dynein 8 kDa light chain, flagellar outer arm OS=Chlamydomonas reinhardtii PE=1 SV=1	dynein light chain LC6, flagellar outer arm; K10418 dynein light chain LC8-type
green	Unigene17521_All	180.653	gi|71480741|beta-1,3-glucanase	gi|71480740|gb|Camellia sinensis beta-1,3-glucanase mRNA, partial cds	Glucan endo-1,3-beta-glucosidase 3 OS=Arabidopsis thaliana GN=At2g01630 PE=1 SV=2	extensin-like; K03006 DNA-directed RNA polymerase II subunit RPB1 [EC:2.7.7.6]
green	Unigene14444_All	157.406	gi|147865346|hypothetical protein VITISV_018998	gi|359491913|PREDICTED: Vitis vinifera Fanconi anemia group J protein-like	NA	Fanconi anemia group J protein homolog; K15362 fanconi anemia group J protein [EC:3.6.4.12]
green	CL5177.Contig2_All	176.335	gi|565352820|PREDICTED: G2/mitotic-specific cyclin-1-like	gi|470105345|PREDICTED: Fragaria vesca subsp. vesca G2/mitotic-specific cyclin-1-like	G2	G2
green	Unigene14660_All	166.647	gi|590585947|ref| Spc98 family of spindle pole body component, putative isoform 3	gi|470125035|PREDICTED: Fragaria vesca subsp. vesca uncharacterized	NA	gamma-tubulin complex component 6; K16573 gamma-tubulin complex component 6
green	Unigene1324_All	223.744	gi|568830668|PREDICTED: glucan endo-1,3-beta-glucosidase 12-like	gi|568830667|PREDICTED: Citrus sinensis glucan endo-1,3-beta-glucosidase 12-like	Glucan endo-1,3-beta-glucosidase 3 OS=Arabidopsis thaliana GN=At2g01630 PE=1 SV=2	Glucan endo-1 3-beta-D-glucosidase-like protein; K03243 translation initiation factor 5B
green	CL9818.Contig2_All	153.989	gi|296085030|unnamed protein product	gi|359485840|PREDICTED: Vitis vinifera glucose-6-phosphate 1-dehydrogenase, chloroplastic-like	Glucose-6-phosphate 1-dehydrogenase, chloroplastic OS=Solanum tuberosum PE=1 SV=1	glucose-6-phosphate 1-dehydrogenase, chloroplastic-like; K00036 glucose-6-phosphate 1-dehydrogenase [EC:1.1.1.49 1.1.1.363]
green	CL6940.Contig3_All	173.808	gi|225426010|PREDICTED: high mobility group B protein 13-like	gi|359474077|PREDICTED: Vitis vinifera high mobility group B protein 13-like	High mobility group B protein 6 OS=Arabidopsis thaliana GN=HMGB6 PE=2 SV=1	high mobility group B protein 6; K09273 upstream-binding transcription factor
green	CL11773.Contig3_All	170.816	gi|225437255|PREDICTED: uncharacterized protein LOC100247613	gi|30420973|Lens nigricans histone H1 (his1-1) gene, partial cds	Histone H1 OS=Solanum lycopersicum PE=3 SV=1	histone H1; K11275 histone H1
green	CL1541.Contig2_All	138.323	gi|587948817|putative histone H2A.4	gi|330318555|Camellia sinensis clone U10BCDNA 1240 histone H2A	Histone H2A OS=Euphorbia esula PE=2 SV=1	Histone H2A 12; K11251 histone H2A
green	CL5609.Contig4_All	148.748	gi|470108825|PREDICTED: probable histone H2AXa-like	gi|470108824|PREDICTED: Fragaria vesca subsp. vesca probable histone H2AXa-like	Histone H2AX OS=Cicer arietinum GN=HIS2A PE=2 SV=1	histone H2AX; K11251 histone H2A
green	CL5609.Contig1_All	162.604	gi|567881355|hypothetical protein CICLE_v10002804mg	gi|590643266|Theobroma cacao Histone superfamily protein	Probable histone H2AXb OS=Arabidopsis thaliana GN=At1g54690 PE=1 SV=1	histone H2AX-like; K11251 histone H2A
green	CL8667.Contig1_All	195.159	gi|225454489|PREDICTED: histone H3-like centromeric protein HTR12	gi|225454488|PREDICTED: Vitis vinifera histone H3-like centromeric protein HTR12	Histone H3-like centromeric protein HTR12 OS=Arabidopsis thaliana GN=HTR12 PE=1 SV=3	histone H3-like centromeric protein HTR12; K11253 histone H3
green	CL2163.Contig3_All	182.501	gi|225454489|PREDICTED: histone H3-like centromeric protein HTR12	gi|225454488|PREDICTED: Vitis vinifera histone H3-like centromeric protein HTR12	Histone H3-like centromeric protein HTR12 OS=Arabidopsis thaliana GN=HTR12 PE=1 SV=3	histone H3-like centromeric protein HTR12; K11253 histone H3
green	Unigene15504_All	171.974	gi|565468248|7.58959e-53/hypothetical protein CARUB_v10018191mg	gi|189162412|Lotus japonicus genomic DNA, clone: LjB08M07, BM1863, complete sequence	Histone H4 OS=Glycine max PE=3 SV=1	histone H4-like; K11254 histone H4
green	CL3730.Contig3_All	139.212	gi|571543584|PREDICTED: histone H4-like	gi|158828190|Cleome spinosa clone contig83 BAC sequence	Histone H4 OS=Glycine max PE=3 SV=1	histone H4-like; K11254 histone H4
green	CL5777.Contig5_All	187.261	gi|147842416|hypothetical protein VITISV_005586	gi|566183728|Populus trichocarpa high-mobility-group family protein	HMG-Y-related protein A OS=Glycine max PE=2 SV=1	HMG-Y-related protein A-like; K11275 histone H1
green	CL5777.Contig1_All	154.568	gi|596125532|hypothetical protein PRUPE_ppa018145mg	gi|566183728|Populus trichocarpa high-mobility-group family protein	HMG-Y-related protein A OS=Glycine max PE=2 SV=1	HMG-Y-related protein A-like; K11275 histone H1
green	CL5777.Contig4_All	147.534	gi|596125532|hypothetical protein PRUPE_ppa018145mg	gi|566183728|Populus trichocarpa high-mobility-group family protein	HMG-Y-related protein A OS=Glycine max PE=2 SV=1	HMG-Y-related protein A-like; K11275 histone H1
green	CL5598.Contig1_All	219.691	gi|225443835|PREDICTED: uncharacterized protein LOC100248051 [Vitis vinifera]	gi|565393550|PREDICTED: Solanum tuberosum protein CHUP1, chloroplastic-like	NA	hypothetical protein; K14325 RNA-binding protein with serine-rich domain 1
green	CL1401.Contig4_All	145.403	gi|629103362|hypothetical protein EUGRSUZ_F02435	gi|225459321|PREDICTED: Vitis vinifera uncharacterized LOC100260886, transcript variant 2	NA	hypothetical protein; K18635 protein SPIRAL1 and related proteins
green	CL10635.Contig2_All	170.832	gi|359487795|PREDICTED: kinesin-related protein 2-like	gi|359487794|PREDICTED: Vitis vinifera kinesin-related protein 2-like	Kinesin-4 OS=Arabidopsis thaliana GN=ATK4 PE=1 SV=2	kinesin-4-like; K10406 kinesin family member C2
green	CL10635.Contig1_All	142.132	gi|296088325|unnamed protein product	gi|359487794|PREDICTED: Vitis vinifera kinesin-related protein 2-like	Kinesin KP1 OS=Arabidopsis thaliana GN=KP1 PE=1 SV=2	kinesin-4-like; K10406 kinesin family member C2
green	CL6389.Contig2_All	182.071	gi|225455818|PREDICTED: uncharacterized protein LOC100259414	gi|359490921|PREDICTED: Vitis vinifera uncharacterized LOC100259414	Kinesin-like protein FLA10 OS=Chlamydomonas reinhardtii GN=FLA10 PE=1 SV=1	kinesin-like protein KIF18B; K10401 kinesin family member 18
green	CL8853.Contig2_All	201.731	gi|298205235|unnamed protein product	gi|225433493|PREDICTED: Vitis vinifera uncharacterized	Kinesin-like protein KIN12B OS=Arabidopsis thaliana GN=KIN12B PE=1 SV=1	kinesin-like protein KIN12B; K10400 kinesin family member 15
green	CL8853.Contig3_All	183.509	gi|298205235|unnamed protein product	gi|225433493|PREDICTED: Vitis vinifera uncharacterized LOC100264192	Kinesin-like protein KIN12B OS=Arabidopsis thaliana GN=KIN12B PE=1 SV=1	kinesin-like protein KIN12B; K10400 kinesin family member 15
green	CL8853.Contig1_All	159.738	gi|298205235|unnamed protein product	gi|225433493|PREDICTED: Vitis vinifera uncharacterized LOC100264192	Kinesin-like protein KIN12B OS=Arabidopsis thaliana GN=KIN12B PE=1 SV=1	kinesin-like protein KIN12B; K10400 kinesin family member 15
green	CL6189.Contig3_All	146.058	gi|568869167|PREDICTED: lysosomal beta glucosidase-like isoform X1	gi|568869168|PREDICTED: Citrus sinensis lysosomal beta glucosidase-like	Beta-xylosidase	lysosomal beta glucosidase-like; K05349 beta-glucosidase [EC:3.2.1.21]
green	CL6849.Contig2_All	199.571	gi|225427718|PREDICTED: DNA replication licensing factor MCM4	gi|225427717|PREDICTED: Vitis vinifera minichromosome maintenance complex component 4	DNA replication licensing factor MCM4 OS=Arabidopsis thaliana GN=MCM4 PE=1 SV=1	MCM4; DNA replication licensing factor MCM4; K02212 DNA replication licensing factor MCM4 [EC:3.6.4.12]
green	CL11581.Contig1_All	176.099	gi|567912509|hypothetical protein CICLE_v10014269mg	gi|359495512|PREDICTED: Vitis vinifera minichromosome maintenance complex component 6	DNA replication licensing factor MCM6 OS=Arabidopsis thaliana GN=MCM6 PE=1 SV=1	MCM6; DNA replication licensing factor MCM6; K02542 DNA replication licensing factor MCM6 [EC:3.6.4.12]
green	CL1668.Contig1_All	144.298	gi|296081882|unnamed protein product	gi|568844430|PREDICTED: Citrus sinensis myb-related protein 3R-1-like	Myb-related protein 3R-1 OS=Arabidopsis thaliana GN=MYB3R-1 PE=2 SV=1	myb-related protein 3R-1; K09420 myb proto-oncogene protein
green	CL2570.Contig2_All	141.925	gi|590620721|Duplicated homeodomain-like superfamily protein, putative	gi|358350485|Malus x domestica mRNA, microsatellite: MEST039, clone: FRT01_18_F07	Anthocyanin regulatory C1 protein OS=Zea mays GN=C1 PE=2 SV=1	myb-related protein Zm38; K09422 myb proto-oncogene protein, plant
green	Unigene13583_All	185.847	gi|359491024|PREDICTED: thaumatin-like protein-like [Vitis vinifera] &gt;gi|297734316|emb|CBI15563.3| unnamed protein product [Vitis vinifera]	gi|470130722|PREDICTED: Fragaria vesca subsp. vesca thaumatin-like protein-like	Thaumatin-like protein OS=Arabidopsis thaliana GN=At1g18250 PE=2 SV=2	nuclear pore complex protein Nup96 homolog; K14297 nuclear pore complex protein Nup98-Nup96
green	CL6954.Contig1_All	228.839	gi|590631067|Pectin lyase-like superfamily protein isoform 2	gi|147860816|Vitis vinifera contig VV78X145138.21, whole genome shotgun sequence	Probable pectate lyase 12 OS=Arabidopsis thaliana GN=At3g53190 PE=2 SV=2	pectate lyase-like protein 3; K01728 pectate lyase [EC:4.2.2.2]
green	Unigene18063_All	214.723	gi|568869343|PREDICTED: phragmoplast orienting kinesin 2-like	gi|359479091|PREDICTED: Vitis vinifera uncharacterized	NA	phragmoplast orienting kinesin 2-like; K10400 kinesin family member 15
green	CL1668.Contig2_All	174.255	gi|359476374|PREDICTED: myb-related protein 3R-1-like	gi|123702754|Vitis vinifera, whole genome shotgun sequence, contig VV78X096618.37, clone ENTAV 115	Myb-related protein 3R-1 OS=Arabidopsis thaliana GN=MYB3R-1 PE=2 SV=1	POPTRDRAFT_561783; myb family transcription factor family protein; K09420 myb proto-oncogene protein
green	CL1668.Contig3_All	151.126	gi|359476374|PREDICTED: myb-related protein 3R-1-like	gi|123702754|Vitis vinifera, whole genome shotgun sequence, contig VV78X096618.37, clone ENTAV 115	Myb-related protein 3R-1 OS=Arabidopsis thaliana GN=MYB3R-1 PE=2 SV=1	POPTRDRAFT_561783; myb family transcription factor family protein; K09420 myb proto-oncogene protein
green	Unigene16961_All	186.025	gi|255547283|ATP binding protein, putative	NA	NA	POPTRDRAFT_569944; hypothetical protein; K14440 SWI
green	Unigene18993_All	160.046	gi|225435046|PREDICTED: probable histone H2B.1-like isoform 1	gi|470117135|PREDICTED: Fragaria vesca subsp. vesca probable histone H2B.1-like	Probable histone H2B.1 OS=Medicago truncatula PE=1 SV=3	probable histone H2B.1; K11252 histone H2B
green	CL2399.Contig4_All	155.601	gi|225435046|PREDICTED: probable histone H2B.1-like isoform 1	gi|470116863|PREDICTED: Fragaria vesca subsp. vesca probable histone H2B.1-like	Probable histone H2B.1 OS=Medicago truncatula PE=1 SV=3	probable histone H2B.1; K11252 histone H2B
green	CL3666.Contig1_All	161.191	gi|568880690|PREDICTED: protein DEK-like isoform X1	gi|359491563|PREDICTED: Vitis vinifera uncharacterized LOC100245819	Nucleolin 1 OS=Oryza sativa subsp. japonica GN=Os08g0192900 PE=2 SV=1	protein DEK-like; K17046 protein DEK
green	CL3691.Contig5_All	191.08	gi|225429506|PREDICTED: uncharacterized protein LOC100254187	gi|225429505|0.0/PREDICTED: Vitis vinifera uncharacterized	Protein IQ-DOMAIN 1 OS=Arabidopsis thaliana GN=IQD1 PE=1 SV=1	protein gar2; K14411 RNA-binding protein Musashi
green	CL10281.Contig2_All	217.059	gi|565387030|PREDICTED: serine/threonine-protein kinase Aurora-3-like	gi|565387029|PREDICTED: Solanum tuberosum serine/threonine-protein kinase Aurora-3-like	Serine	serine
green	CL12067.Contig2_All	161.125	gi|225432402|PREDICTED: serine/threonine-protein kinase ULK4-like	gi|225432401|PREDICTED: Vitis vinifera serine/threonine-protein kinase ULK4-like	NA	serine
green	CL4254.Contig2_All	142.916	gi|225429402|PREDICTED: serine/threonine-protein kinase Aurora-1	gi|359476153|PREDICTED: Vitis vinifera serine/threonine-protein kinase Aurora-1-like	Serine	serine
green	CL4279.Contig3_All	175.333	gi|629088807|hypothetical protein EUGRSUZ_I01035	gi|359475540|PREDICTED: Vitis vinifera serine carboxypeptidase-like 18	Serine carboxypeptidase-like 18 OS=Arabidopsis thaliana GN=SCPL18 PE=2 SV=2	serine carboxypeptidase-like 18; K16296 serine carboxypeptidase-like clade I [EC:3.4.16.-]
green	Unigene12316_All	193.851	gi|595812953|hypothetical protein PRUPE_ppa024687mg, partial	gi|568824567|PREDICTED: Citrus sinensis uncharacterized	NA	transcription factor jumonji domain-containing protein; K15601 lysine-specific demethylase 3 [EC:1.14.11.-]
green	CL2011.Contig3_All	139.518	gi|214003725|alpha tubulin	gi|99082882|Camellia sinensis alpha tubulin 1	Tubulin alpha chain OS=Prunus dulcis GN=TUBA PE=2 SV=1	tubulin alpha chain; K07374 tubulin alpha
green	CL748.Contig17_All	149.694	gi|511783112|putative tubulin beta-2-like protein	gi|470116122|PREDICTED: Fragaria vesca subsp. vesca tubulin beta-1 chain-like	Tubulin beta-3 chain OS=Arabidopsis thaliana GN=TUBB3 PE=2 SV=2	tubulin beta-2 chain; K07375 tubulin beta
green	CL748.Contig16_All	143.883	gi|511783112|putative tubulin beta-2-like protein	gi|470116122|PREDICTED: Fragaria vesca subsp. vesca tubulin beta-1 chain-like	Tubulin beta-3 chain OS=Arabidopsis thaliana GN=TUBB3 PE=2 SV=2	tubulin beta-2 chain; K07375 tubulin beta
green	CL5272.Contig2_All	166.504	gi|629084774|gb|hypothetical protein EUGRSUZ_J00733	gi|565393298|PREDICTED: Solanum tuberosum ubiquitin-conjugating enzyme E2 20-like	Ubiquitin-conjugating enzyme E2 20 OS=Arabidopsis thaliana GN=UBC20 PE=2 SV=1	ubiquitin-conjugating enzyme E2 20-like; K06688 ubiquitin-conjugating enzyme E2 C [EC:2.3.2.23]
green	Unigene17859_All	202.506	gi|147780567|hypothetical protein VITISV_017339	gi|359480625|PREDICTED: Vitis vinifera uncharacterized	NA	uncharacterized LOC100264215; K11492 condensin-2 complex subunit G2
green	CL5609.Contig3_All	158.973	gi|351724209|uncharacterized protein LOC100305465	gi|568835786|PREDICTED: Citrus sinensis histone H2AX-like	Probable histone H2AXb OS=Arabidopsis thaliana GN=At1g54690 PE=1 SV=1	uncharacterized LOC100305465; K11251 histone H2A
green	CL3730.Contig5_All	166.098	gi|593175985|hypothetical protein PHAVU_011G069500g, partial	gi|330318552|Camellia sinensis clone U10BCDNA 3029 histone H4 mRNA, complete cds	Histone H4 OS=Glycine max PE=3 SV=1	uncharacterized LOC101252889; K11254 histone H4
green	CL2178.Contig3_All	144.141	gi|565468248|hypothetical protein CARUB_v10018191mg	gi|330318552|Camellia sinensis clone U10BCDNA 3029 histone H4 mRNA, complete cds	Histone H4 OS=Glycine max PE=3 SV=1	uncharacterized LOC101252991; K11254 histone H4
green	CL8558.Contig1_All	209.606	gi|296081164|unnamed protein product	gi|359493102|PREDICTED: Vitis vinifera uncharacterized	NA	NA
green	Unigene11540_All	189.883	gi|359479520|PREDICTED: uncharacterized protein LOC100248360	gi|359479519|6e-62/PREDICTED: Vitis vinifera uncharacterized	NA	NA
green	Unigene15660_All	189.609	gi|595842637|6.67985e-18/hypothetical protein PRUPE_ppa003947mg	gi|566214179|Populus trichocarpa hypothetical protein	NA	NA
green	Unigene19954_All	183.499	gi|567902056|hypothetical protein CICLE_v10018674mg	gi|568851020|PREDICTED: Citrus sinensis uncharacterized LOC102618624	C2 and GRAM domain-containing protein At1g03370 OS=Arabidopsis thaliana GN=At1g03370 PE=2 SV=4	NA
green	CL8624.Contig1_All	180.074	gi|225448645|PREDICTED: mini-chromosome maintenance complex-binding protein	gi|359486469|PREDICTED: Vitis vinifera mini-chromosome maintenance complex-binding protein-like	Mini-chromosome maintenance complex-binding protein OS=Arabidopsis thaliana GN=ETG1 PE=1 SV=1	NA
green	CL9880.Contig2_All	175.02	gi|590654823|Uncharacterized protein isoform 1	NA	NA	NA
green	Unigene13550_All	174.842	gi|587929100|hypothetical protein L484_024449	NA	NA	NA
green	CL6985.Contig1_All	164.81	gi|567854321|hypothetical protein CICLE_v10004264mg	gi|225433194|PREDICTED: Vitis vinifera uncharacterized	NA	NA
green	Unigene12988_All	154.056	NA	NA	NA	NA
green	CL1304.Contig2_All	148.067	gi|147840870hypothetical protein VITISV_018991	gi|359487900|PREDICTED: Vitis vinifera uncharacterized LOC100265943	Protein tesmin	NA
green	CL11414.Contig1_All	138.773	gi|359479430|PREDICTED: shugoshin-1-like	gi|359479429|PREDICTED: Vitis vinifera shugoshin-1-like	Shugoshin-1 OS=Zea mays GN=SGO1 PE=2 SV=1	NA
lightgreen	CL11074.Contig2_All	3.09479	gi|hypothetical protein MIMGU_mgv1a024293mg, partial	NA	NA	ethylene-insensitive protein 2-like; K14513 ethylene-insensitive protein 2
lightgreen	CL829.Contig1_All	2.64824	gi|225423965|PREDICTED: ethylene-responsive transcription factor ERF118	gi|502120833|PREDICTED: Cicer arietinum ethylene-responsive transcription factor ERF118-like	Ethylene-responsive transcription factor ERF118 OS=Arabidopsis thaliana GN=ERF118 PE=2 SV=1	pathogenesis-related genes transcriptional activator PTI6; K13434 pathogenesis-related genes transcriptional activator PTI6
lightgreen	Unigene6528_All	2.13796	gi|297745567|unnamed protein product	gi|147865344|Vitis vinifera contig VV78X200627.9, whole genome shotgun sequence	Pentatricopeptide repeat-containing protein At5g64320, mitochondrial OS=Arabidopsis thaliana GN=At5g64320 PE=2 SV=1	pentatricopeptide repeat-containing protein At5g55840-like; K17964 leucine-rich PPR motif-containing protein, mitochondrial
lightgreen	Unigene11359_All	3.00735	gi|PREDICTED: uncharacterized protein LOC100264071	gi|359474870|PREDICTED: Vitis vinifera uncharacterized	NA	uncharacterized LOC100264071; K14311 nuclear pore complex protein Nup188
lightgreen	Unigene20562_All	5.026	gi|596293667|hypothetical protein PRUPE_ppa020120mg	NA	NA	uncharacterized LOC100855389; K11292 transcription elongation factor SPT6
lightgreen	Unigene17741_All	4.07139	gi|407731642|gag-pol precursor	NA	NA	uncharacterized LOC102610907; K12153 phenylalanine N-monooxygenase [EC:1.14.13.124]
lightgreen	Unigene17452_All	3.48219	gi|470132197|PREDICTED: uncharacterized protein LOC101291061	NA	NA	NA
lightgreen	Unigene19948_All	2.67096	NA	gi|393715712|Camellia sinensis DNA, SSR marker, MSG0794	NA	NA
lightgreen	CL7265.Contig2_All	2.38467	gi|359480051|PREDICTED: histone-lysine N-methyltransferase SUVR2-like	gi|359480050|PREDICTED: Vitis vinifera histone-lysine N-methyltransferase SUVR2-like (LOC100243013), mRNA	NA	NA
white	Unigene18283_All	0.496323	gi|566156488|mitogen-activated protein kinase	gi|359485143|PREDICTED: Vitis vinifera mitogen-activated protein kinase 20-like	Mitogen-activated protein kinase 20 OS=Arabidopsis thaliana GN=MPK20 PE=1 SV=2	mitogen-activated protein kinase 10-like; K04371 mitogen-activated protein kinase 1
white	CL2073.Contig2_All	0.719822	gi|225425280|PREDICTED: transaldolase isoform 1	gi|225425279|PREDICTED: Vitis vinifera transaldolase-like, transcript variant 1	Transaldolase (Fragments) OS=Capsicum annuum var. annuum PE=1 SV=1	uncharacterized LOC100247241; K00616 transaldolase [EC:2.2.1.2]
white	Unigene28130_All	0.781332	gi|595925243|hypothetical protein PRUPE_ppa001823mg	gi|590711662|Theobroma cacao Uncharacterized protein isoform 2 (TCM_002166) mRNA, partial cds	NA	NA
white	CL965.Contig1_All	0.736562	gi|296086395|unnamed protein product	NA	NA	NA
yellow	CL7956.Contig1_All	939.28	gi|225447019PREDICTED: (+)-pulegone reductase	gi|349722778|Vitis vinifera clone SS0AFA2YJ10	2-alkenal reductase (NADP(+)-dependent) OS=Nicotiana tabacum GN=DBR PE=1 SV=1	2-alkenal reductase (NADP(+)-dependent); K07119 uncharacterized protein
yellow	CL483.Contig5_All	975.811	gi|571504288|PREDICTED: uncharacterized protein LOC100780312	gi|239582818|Brassica napus clone JBnB074N14	NA	70 kDa peptidyl-prolyl isomerase; K09571 FK506-binding protein 4
yellow	Unigene10232_All	932.552	gi|523712978|cotton annexin 4	gi|523712977|Gossypium hirsutum cotton annexin 4 mRNA, complete cds	Annexin-like protein RJ4 OS=Fragaria ananassa PE=2 SV=2	annexin-like protein RJ4; K17095 annexin A7
yellow	CL9238.Contig2_All	1040.59	gi|393990624|UDP-glucose crocetin glucosyltransferase	gi|566204244|Populus trichocarpa INDOLE-3-ACETATE BETA-D-GLUCOSYLTRANSFERASE family protein	Anthocyanidin 3-O-glucoside 5-O-glucosyltransferase 1 OS=Perilla frutescens GN=PF3R4 PE=1 SV=1	anthocyanidin 3-O-glucoside 5-O-glucosyltransferase 1-like; K12338 anthocyanidin 3-O-glucoside 5-O-glucosyltransferase [EC:2.4.1.298]
yellow	CL2959.Contig3_All	957.174	gi|586779049|hypothetical protein AMTR_s00071p00057620	gi|590594232|Theobroma cacao SNARE-like superfamily protein	AP-2 complex subunit sigma OS=Arabidopsis thaliana GN=AP17 PE=2 SV=1	AP-2 complex subunit sigma; K11827 AP-2 complex subunit sigma-1
yellow	CL1890.Contig1_All	937.393	gi|573014765uncharacterized protein LOC102589097	gi|460402433|PREDICTED: Solanum lycopersicum protein NDR1-like	Protein YLS9 OS=Arabidopsis thaliana GN=YLS9 PE=2 SV=1	ATSYP24; syntaxin-24; K08488 syntaxin 7
yellow	CL8360.Contig3_All	1022.05	gi|604342036|hypothetical protein MIMGU_mgv1a017994mg	gi|593702020|Phaseolus vulgaris hypothetical protein	Putative DNA-binding protein ESCAROLA OS=Arabidopsis thaliana GN=ESC PE=2 SV=1	biogenesis of lysosome-related organelles complex 1 subunit 2-like; K16750 biogenesis of lysosome-related organelles complex 1 subunit 2
yellow	CL8700.Contig1_All	1015.67	gi|357497069|Calcium-binding protein CML38	gi|357497068|Medicago truncatula Calcium-binding protein CML38	Calcium-binding protein CML38 OS=Arabidopsis thaliana GN=CML38 PE=2 SV=1	Calcium-binding protein CML38; K13448 calcium-binding protein CML
yellow	CL4560.Contig3_All	1039.5	gi|604299244|hypothetical protein MIMGU_mgv1a016452mg	gi|590608125|Theobroma cacao Calcium-binding EF-hand family protein	Calcium-binding protein PBP1 OS=Arabidopsis thaliana GN=PBP1 PE=1 SV=1	calcium-binding protein KIC-like; K02183 calmodulin
yellow	CL4560.Contig1_All	1001.93	gi|566195260|hypothetical protein POPTR_0011s13280g	gi|359485718|PREDICTED: Vitis vinifera calcium-binding protein PBP1-like	Calcium-binding protein PBP1 OS=Arabidopsis thaliana GN=PBP1 PE=1 SV=1	calcium-binding protein KIC-like; K02183 calmodulin
yellow	CL11685.Contig1_All	968.59	gi|224124692|1.21673e-43/hypothetical protein POPTR_0013s14730g	gi|359485718|PREDICTED: Vitis vinifera calcium-binding protein PBP1-like	Calcium-binding protein PBP1 OS=Arabidopsis thaliana GN=PBP1 PE=1 SV=1	calcium-binding protein KIC-like; K02183 calmodulin
yellow	Unigene17517_All	1005.02	gi|225439821|PREDICTED: calcium-transporting ATPase 4, endoplasmic reticulum-type-like	gi|225439820|PREDICTED: Vitis vinifera calcium-transporting ATPase 4, endoplasmic reticulum-type-like	Calcium-transporting ATPase 1, endoplasmic reticulum-type OS=Arabidopsis thaliana GN=ECA1 PE=1 SV=2	calcium-transporting ATPase 4, endoplasmic reticulum-type-like; K01537 Ca2+-transporting ATPase [EC:3.6.3.8]
yellow	CL6041.Contig9_All	973.988	gi|225428883|PREDICTED: uncharacterized protein LOC100241815	gi|359475428|PREDICTED: Vitis vinifera uncharacterized	Leucine-rich repeat extensin-like protein 5 OS=Arabidopsis thaliana GN=LRX5 PE=2 SV=2	CDPK1; calcium-dependent protein kinase 1 (EC:2.7.1.-); K13412 calcium-dependent protein kinase [EC:2.7.11.1]
yellow	CL11361.Contig1_All	1046.13	gi|225433620|PREDICTED: UDP-glycosyltransferase 75D1-like	gi|359478016|PREDICTED: Vitis vinifera UDP-glycosyltransferase 75D1-like	Anthocyanidin 3-O-glucoside 5-O-glucosyltransferase OS=Verbena hybrida GN=HGT8 PE=2 SV=1	crocetin glucosyltransferase, chloroplastic-like; K12338 anthocyanidin 3-O-glucoside 5-O-glucosyltransferase [EC:2.4.1.298]
yellow	CL3395.Contig2_All	993.85	gi|470109301|PREDICTED: isoflavone 2&apos;-hydroxylase-like isoform 1	gi|470113049|PREDICTED: Fragaria vesca subsp. vesca isoflavone 2'-hydroxylase-like	Isoflavone 2'-hydroxylase OS=Glycyrrhiza echinata GN=CYP81E1 PE=1 SV=2	cytochrome P450 81E8-like; K13260 isoflavone 2'-hydroxylase [EC:1.14.13.89]
yellow	CL3355.Contig3_All	984.974	gi|359474703|PREDICTED: sulfotransferase 16-like	gi|330318799|Camellia sinensis clone U10BcDNA 0859 flavonol 4'-sulfotransferase mRNA, partial cds	Cytosolic sulfotransferase 15 OS=Arabidopsis thaliana GN=SOT15 PE=1 SV=1	cytosolic sulfotransferase 15-like; K01014 aryl sulfotransferase [EC:2.8.2.1]
yellow	CL5334.Contig4_All	975.258	gi|225455598|PREDICTED: xyloglucan galactosyltransferase KATAMARI1 homolog	gi|470145035|PREDICTED: Fragaria vesca subsp. vesca xyloglucan galactosyltransferase KATAMARI1 homolog	Xyloglucan galactosyltransferase KATAMARI1 homolog OS=Oryza sativa subsp. japonica GN=Os03g0144800 PE=2 SV=1	DEAD-box ATP-dependent RNA helicase; K16911 ATP-dependent RNA helicase DDX21 [EC:3.6.4.13]
yellow	CL4070.Contig3_All	988.132	gi|510937909|CBF-like protein	gi|510937908|Camellia sinensis CBF-like protein mRNA, complete cds	Dehydration-responsive element-binding protein 1D OS=Arabidopsis thaliana GN=DREB1D PE=2 SV=1	dehydration-responsive element-binding protein 1A; K09286 EREBP-like factor
yellow	CL4070.Contig1_All	963.918	gi|510937909|2.57536e-82/CBF-like protein	gi|510937908|Camellia sinensis CBF-like protein	Dehydration-responsive element-binding protein 1D OS=Arabidopsis thaliana GN=DREB1D PE=2 SV=1	dehydration-responsive element-binding protein 1A; K09286 EREBP-like factor
yellow	CL1782.Contig2_All	1071.16	gi|225468380|PREDICTED: scarecrow-like protein 13	gi|359496859|PREDICTED: Vitis vinifera scarecrow-like protein 13	Scarecrow-like protein 13 OS=Arabidopsis thaliana GN=SCL13 PE=2 SV=2	DELLA protein RGL2; K14494 DELLA protein
yellow	CL11382.Contig1_All	948.829	gi|595859233|hypothetical protein PRUPE_ppa000714mg	gi|147859986|Vitis vinifera contig VV78X008883.5, whole genome shotgun sequence	Probable pre-mRNA-splicing factor ATP-dependent RNA helicase OS=Arabidopsis thaliana GN=At3g26560 PE=1 SV=2	DHX16; DEAH (Asp-Glu-Ala-His) box polypeptide 16; K12813 pre-mRNA-splicing factor ATP-dependent RNA helicase DHX16 [EC:3.6.4.13]
yellow	CL6938.Contig2_All	947.766	gi|470128499|PREDICTED: disease resistance protein RPM1-like	NA	Disease resistance protein RPM1 OS=Arabidopsis thaliana GN=RPM1 PE=1 SV=1	disease resistance protein RPM1-like; K13457 disease resistance protein RPM1
yellow	CL8509.Contig1_All	935.229	gi|147766268|hypothetical protein VITISV_032893	gi|571478629|PREDICTED: Glycine max disease resistance protein RPM1-like	Disease resistance protein RPM1 OS=Arabidopsis thaliana GN=RPM1 PE=1 SV=1	disease resistance protein RPM1-like; K13457 disease resistance protein RPM1
yellow	CL6033.Contig1_All	938.969	gi|225456469|PREDICTED: uncharacterized protein LOC100242176	gi|225456468|PREDICTED: Vitis vinifera uncharacterized	Dual specificity protein phosphatase PHS1 OS=Arabidopsis thaliana GN=PHS1 PE=1 SV=1	dual specificity protein phosphatase PHS1; K14165 atypical dual specificity phosphatase [EC:3.1.3.16 3.1.3.48]
yellow	CL2225.Contig2_All	1024.79	gi|593695271|hypothetical protein PHAVU_006G183100g	gi|292668912|Malus x domestica AP2 domain class transcription factor	Ethylene-responsive transcription factor 4 OS=Nicotiana sylvestris GN=ERF4 PE=2 SV=1	ethylene-responsive transcription factor 4-like; K09286 EREBP-like factor
yellow	CL9492.Contig1_All	954.63	gi|300079004|ethylene response factor 4	gi|443267183|Diospyros kaki ethylene response factor 10 (ERF10)	Ethylene-responsive transcription factor RAP2-12 OS=Arabidopsis thaliana GN=RAP2-12 PE=1 SV=1	ethylene-responsive transcription factor ERF073; K09286 EREBP-like factor
yellow	CL9210.Contig2_All	1010.16	gi|225428806|PREDICTED: ethylene-responsive transcription factor ERF109	gi|115441276|Oryza sativa Japonica Group	Ethylene-responsive transcription factor ERF109 OS=Arabidopsis thaliana GN=ERF109 PE=1 SV=1	ethylene-responsive transcription factor RAP2-3-like; K09286 EREBP-like factor
yellow	CL3333.Contig1_All	1019.37	gi|590610488|Flavonol 4&apos;-sulfotransferase	gi|590610494|Theobroma cacao Flavonol 4'-sulfotransferase	Cytosolic sulfotransferase 5 OS=Arabidopsis thaliana GN=SOT5 PE=1 SV=1	Flavonol 4'-sulfotransferase; K01025
yellow	CL9160.Contig2_All	968.408	gi|225436210|PREDICTED: uncharacterized protein LOC100267691	gi|123683514|Vitis vinifera, whole genome shotgun sequence, contig VV79X004352.3, clone ENTAV 115	Glycine-rich protein A3 OS=Daucus carota PE=2 SV=1	formin-like protein 12; K02184 formin 2
yellow	CL7794.Contig1_All	1050.88	gi|596289980|hypothetical protein PRUPE_ppa010943mg	gi|147857310|Vitis vinifera contig VV78X059322.2, whole genome shotgun sequence	Proline-rich receptor-like protein kinase PERK2 OS=Arabidopsis thaliana GN=PERK2 PE=2 SV=3	formin-like protein 5; K02184 formin 2
yellow	CL2347.Contig8_All	976.874	gi|82697969|CXE carboxylesterase	gi|82697968|Actinidia deliciosa CXE carboxylesterase	Probable carboxylesterase 16 OS=Arabidopsis thaliana GN=CXE16 PE=2 SV=1	gibberellin receptor GID1C; K14493 gibberellin receptor GID1 [EC:3.-.-.-]
yellow	CL4452.Contig1_All	968.526	gi|604333033|hypothetical protein MIMGU_mgv1a005873mg	gi|568860311|PREDICTED: Citrus sinensis glucan endo-1,3-beta-glucosidase 5-like	Glucan endo-1,3-beta-glucosidase 5 OS=Arabidopsis thaliana GN=At4g31140 PE=1 SV=1	Glucan endo-1 3-beta-D-glucosidase-like protein; K03243 translation initiation factor 5B
yellow	CL3.Contig5_All	964.131	gi|225440560|PREDICTED: laccase-7	gi|225440559|PREDICTED: Vitis vinifera laccase-7-like	Laccase-7 OS=Arabidopsis thaliana GN=LAC7 PE=2 SV=1	laccase-7; K05909 laccase [EC:1.10.3.2]
yellow	CL728.Contig2_All	1005.57	gi|629085086|hypothetical protein EUGRSUZ_J00966	gi|225435178|PREDICTED: Vitis vinifera mitogen-activated protein kinase 3-like	Mitogen-activated protein kinase 3 OS=Arabidopsis thaliana GN=MPK3 PE=1 SV=2	mitogen-activated protein kinase 3; K04371 mitogen-activated protein kinase 1
yellow	CL837.Contig2_All	982.7	gi|590659390Myb domain protein 13, putative	gi|566156126|Populus trichocarpa GmMYB29 family protein (POPTR_0002s03960g) mRNA, complete cds	Myb-related protein Myb4 OS=Oryza sativa subsp. japonica GN=MYB4 PE=2 SV=2	myb-related protein Myb4; K09422 myb proto-oncogene protein, plant
yellow	CL690.Contig1_All	998.956	gi|359495806|nodulation receptor kinase-like	gi|359495805|PREDICTED: Vitis vinifera nodulation receptor kinase-like	Nodulation receptor kinase OS=Pisum sativum GN=NORK PE=1 SV=1	nodulation receptor kinase-like; K04730 interleukin-1 receptor-associated kinase 1 [EC:2.7.11.1]
yellow	CL12143.Contig1_All	962.533	gi|225456213|PREDICTED: nudix hydrolase 17, mitochondrial-like	gi|568830036|PREDICTED: Citrus sinensis nudix hydrolase 17, mitochondrial-like	Nudix hydrolase 18, mitochondrial OS=Arabidopsis thaliana GN=NUDT18 PE=2 SV=1	nudix hydrolase 18, mitochondrial-like; K07766 diphosphoinositol-polyphosphate diphosphatase [EC:3.6.1.52]
yellow	CL11107.Contig1_All	1004.86	gi|225462588|PREDICTED: hydroxycinnamoyl-Coenzyme A shikimate/quinate hydroxycinnamoyltransferase	gi|225443481|PREDICTED: Vitis vinifera hydroxycinnamoyl-Coenzyme A shikimate/quinate hydroxycinnamoyltransferase-like	Anthranilate N-benzoyltransferase protein 1 OS=Dianthus caryophyllus GN=HCBT1 PE=1 SV=1	omega-hydroxypalmitate O-feruloyl transferase-like; K15400 omega-hydroxypalmitate O-feruloyl transferase [EC:2.3.1.188]
yellow	Unigene12281_All	1025.96	gi|573921405|PREDICTED: leucine-rich repeat extensin-like protein 5-like	gi|403240336|Camellia sinensis clone pCsSSR2418 microsatellite sequences	Vegetative cell wall protein gp1 OS=Chlamydomonas reinhardtii GN=GP1 PE=1 SV=1	Os10g0524400, PLDbeta1, PHOSPHOLIPASE_D_beta_1; Similar to Phospholipase D beta 2.; K01115 phospholipase D1
yellow	CL321.Contig5_All	934.566	gi|255554971|Pectinesterase precursor, putative	gi|566192934|Populus trichocarpa pectin methylesterase family protein	Pectinesterase	pectinesterase; K01051 pectinesterase [EC:3.1.1.11]
yellow	CL321.Contig3_All	930.29	gi|255554971|Pectinesterase precursor, putative	gi|566192934|Populus trichocarpa pectin methylesterase family protein	Pectinesterase	pectinesterase; K01051 pectinesterase [EC:3.1.1.11]
yellow	CL6041.Contig8_All	996.052	gi|239835409|hypothetical protein	gi|565380365|PREDICTED: Solanum tuberosum protein transport protein SEC31-like	Extensin-2 OS=Arabidopsis thaliana GN=EXT2 PE=2 SV=1	phospholipase D gamma 1; K01115 phospholipase D1
yellow	CL1339.Contig4_All	953.486	gi|297739370|unnamed protein product	gi|571516711|PREDICTED: Glycine max acetolactate synthase 2, chloroplastic-like	Polyadenylate-binding protein 5 OS=Arabidopsis thaliana GN=PAB5 PE=1 SV=3	polyadenylate-binding protein 3; K13126 polyadenylate-binding protein
yellow	CL169.Contig9_All	1010.08	gi|444300800|aquaporin protein 6	gi|444300799|Camellia sinensis aquaporin protein 6 mRNA, complete cds	Probable aquaporin TIP1-2 OS=Oryza sativa subsp. japonica GN=TIP1-2 PE=2 SV=1	POPTRDRAFT_549212; nodulin-26 family protein; K09873 aquaporin TIP
yellow	Unigene18855_All	943.774	gi|565379062| WAT1-related protein At3g28050-like	gi|302030248|Ficus carica clone UFFc8 microsatellite sequence	WAT1-related protein At3g28050 OS=Arabidopsis thaliana GN=At3g28050 PE=2 SV=1	probable fructose-bisphosphate aldolase 3, chloroplastic; K01623 fructose-bisphosphate aldolase, class I [EC:4.1.2.13]
yellow	CL3485.Contig2_All	984.028	gi|359497139|PREDICTED: probable mannitol dehydrogenase-like	gi|554521653|Vitis vinifera cultivar Tempranillo mannitol dehydrogenase 1 mRNA, complete cds	Probable mannitol dehydrogenase OS=Fragaria ananassa GN=CAD PE=1 SV=1	probable mannitol dehydrogenase; K00083 cinnamyl-alcohol dehydrogenase [EC:1.1.1.195]
yellow	CL5020.Contig4_All	940.973	gi|567864896|hypothetical protein CICLE_v10028590mg	gi|359478825|PREDICTED: Vitis vinifera probable protein phosphatase 2C 25-like, transcript variant 1	Probable protein phosphatase 2C 25 OS=Arabidopsis thaliana GN=At2g30020 PE=1 SV=1	probable protein phosphatase 2C 25; K17506 protein phosphatase 1L [EC:3.1.3.16]
yellow	CL1122.Contig1_All	976.988	gi|629098715|hypothetical protein EUGRSUZ_G02088	gi|470123476|PREDICTED: Fragaria vesca subsp. vesca probable S-adenosylmethionine-dependent methyltransferase At5g37990-like	Probable S-adenosylmethionine-dependent methyltransferase At5g38100 OS=Arabidopsis thaliana GN=At5g38100 PE=2 SV=1	probable S-adenosylmethionine-dependent methyltransferase At5g38100; K18848 indole-3-acetate O-methyltransferase [EC:2.1.1.278]
yellow	CL11648.Contig1_All	1028.38	gi|571442346|PREDICTED: probable serine/threonine-protein kinase WNK11-like	gi|565358698|PREDICTED: Solanum tuberosum probable serine/threonine-protein kinase WNK11-like	Probable serine	probable serine
yellow	Unigene1144_All	1000.94	gi|296090366|unnamed protein product	gi|359486915|PREDICTED: Vitis vinifera probable U3 small nucleolar RNA-associated protein 7-like	U-box domain-containing protein 72 OS=Oryza sativa subsp. japonica GN=PUB72 PE=2 SV=1	probable U3 small nucleolar RNA-associated protein 7; K14768 U3 small nucleolar RNA-associated protein 7
yellow	Unigene11840_All	952.5	gi|224075078|WRKY transcription factor 53 family protein	gi|225425999|PREDICTED: Vitis vinifera probable WRKY transcription factor 41-like	Probable WRKY transcription factor 53 OS=Arabidopsis thaliana GN=WRKY53 PE=1 SV=1	probable WRKY transcription factor 27; K13425 WRKY transcription factor 22
yellow	Unigene17826_All	1027.47	gi|629114057|gb|hypothetical protein EUGRSUZ_C00176	gi|359485137|PREDICTED: Vitis vinifera probable xyloglucan endotransglucosylase/hydrolase protein 23-like	Probable xyloglucan endotransglucosylase	probable xyloglucan endotransglucosylase
yellow	CL10671.Contig3_All	976.809	gi|604318610|hypothetical protein MIMGU_mgv1a024272mg, partial	gi|225424332|PREDICTED: Vitis vinifera protein PLANT CADMIUM RESISTANCE 2-like	Cell number regulator 2 OS=Zea mays GN=CNR2 PE=2 SV=1	Sec23
yellow	CL2201.Contig1_All	953.526	gi|359494303|PREDICTED: serine acetyltransferase 1, chloroplastic-like	gi|566153280|Populus trichocarpa serine acetyltransferase family protein	Serine acetyltransferase 3, mitochondrial OS=Arabidopsis thaliana GN=SAT3 PE=1 SV=3	serine acetyltransferase 1, chloroplastic; K00640 serine O-acetyltransferase [EC:2.3.1.30]
yellow	CL2985.Contig2_All	1037.21	gi|55294656|putative arabinogalactan-protein precursor	NA	Classical arabinogalactan protein 5 OS=Arabidopsis thaliana GN=AGP5 PE=2 SV=2	SNARE-interacting protein-like protein; K15292 syntaxin-binding protein 1
yellow	CL8288.Contig1_All	1023.77	gi|226530630|splicing factor, arginine/serine-rich 7	NA	DEAD-box ATP-dependent RNA helicase 42 OS=Arabidopsis thaliana GN=RH42 PE=1 SV=2	splicing factor, arginine
yellow	Unigene1833_All	1063.92	gi|595796251|hypothetical protein PRUPE_ppa017276mg	gi|596052930|Prunus persica hypothetical protein	Probable WRKY transcription factor 19 OS=Arabidopsis thaliana GN=WRKY19 PE=2 SV=1	TMV resistance protein N-like; K19613 leucine-rich repeat protein SHOC2
yellow	CL1341.Contig5_All	1026.09	gi|567898462|hypothetical protein CICLE_v10018572mg	gi|357468652|Medicago truncatula TIR-NBS-LRR RCT1-like resistance protein	Probable WRKY transcription factor 19 OS=Arabidopsis thaliana GN=WRKY19 PE=2 SV=1	TMV resistance protein N-like; K19613 leucine-rich repeat protein SHOC2
yellow	CL11844.Contig7_All	996.585	gi|225427794|PREDICTED: uncharacterized protein LOC100255631	gi|359475078|PREDICTED: Vitis vinifera uncharacterized LOC100255631	Probable transcription factor PosF21 OS=Arabidopsis thaliana GN=POSF21 PE=2 SV=1	transcription factor HBP-1a-like; K09060 plant G-box-binding factor
yellow	CL1522.Contig1_All	1039.25	gi|296083129|unnamed protein product	gi|225470825|PREDICTED: Vitis vinifera tryptophan aminotransferase-related protein 4-like	Tryptophan aminotransferase-related protein 3 OS=Arabidopsis thaliana GN=TAR3 PE=3 SV=1	tryptophan aminotransferase-related protein 2-like; K16903 L-tryptophan---pyruvate aminotransferase [EC:2.6.1.99]
yellow	CL6149.Contig2_All	985.156	gi|502121493|PREDICTED: uncharacterized protein LOC101505540	NA	NA	Tyrosine
yellow	Unigene20285_All	1019.98	gi|55294656|putative arabinogalactan-protein precursor	NA	Classical arabinogalactan protein 5 OS=Arabidopsis thaliana GN=AGP5 PE=2 SV=2	ubiquitin carboxyl-terminal hydrolase 36; K11855 ubiquitin carboxyl-terminal hydrolase 36
yellow	CL2985.Contig3_All	1002.36	gi|565389006|PREDICTED: classical arabinogalactan protein 5-like	NA	Classical arabinogalactan protein 5 OS=Arabidopsis thaliana GN=AGP5 PE=2 SV=2	ubiquitin carboxyl-terminal hydrolase 36; K11855 ubiquitin carboxyl-terminal hydrolase 36
yellow	CL2985.Contig1_All	962.685	gi|55294656|putative arabinogalactan-protein precursor	NA	Classical arabinogalactan protein 5 OS=Arabidopsis thaliana GN=AGP5 PE=2 SV=2	ubiquitin carboxyl-terminal hydrolase 36; K11855 ubiquitin carboxyl-terminal hydrolase 36
yellow	CL11888.Contig1_All	968.631	gi|225439655|PREDICTED: U-box domain-containing protein 16	gi|147803360|Vitis vinifera contig VV78X213517.5, whole genome shotgun sequence	U-box domain-containing protein 16 OS=Arabidopsis thaliana GN=PUB16 PE=2 SV=1	U-box domain-containing protein 14-like; K08332 vacuolar protein 8
yellow	CL5317.Contig2_All	972.383	gi|359472697|PREDICTED: uncharacterized protein LOC100252495	gi|147784270|Vitis vinifera contig VV78X087035.51, whole genome shotgun sequence	NA	uncharacterized LOC100252495; K19476 vacuolar protein sorting-associated protein IST1
yellow	CL5317.Contig1_All	949.721	gi|359472697|PREDICTED: uncharacterized protein LOC100252495	gi|147784270|Vitis vinifera contig VV78X087035.51, whole genome shotgun sequence	NA	uncharacterized LOC100252495; K19476 vacuolar protein sorting-associated protein IST1
yellow	CL3418.Contig4_All	1014.83	gi|595857668|hypothetical protein PRUPE_ppa016616mg	gi|157410315|Populus trichocarpa clone POP103-K18, complete sequence	Germin-like protein subfamily 1 member 11 OS=Arabidopsis thaliana GN=At5g38940 PE=2 SV=1	uncharacterized LOC101250545; K11426 SET and MYND domain-containing protein
yellow	CL6558.Contig2_All	1022.48	gi|567867323hypothetical protein CICLE_v10027253mg	gi|359496745|PREDICTED: Vitis vinifera uncharacterized	Gibberellin-regulated protein 14 OS=Arabidopsis thaliana GN=GASA14 PE=1 SV=1	uncharacterized LOC103445018; K14827 pre-rRNA-processing protein IPI1
yellow	Unigene14400_All	1018.34	gi|594021565|hypothetical protein	gi|225444847|PREDICTED: Vitis vinifera uncharacterized	NA	uncharacterized LOC103860367; K14861 nucleolar pre-ribosomal-associated protein 1
yellow	CL11804.Contig1_All	1039.44	gi|565365108|PREDICTED: TMV resistance protein N-like isoform X1	gi|565365109|PREDICTED: Solanum tuberosum TMV resistance protein N-like	Probable WRKY transcription factor 19 OS=Arabidopsis thaliana GN=WRKY19 PE=2 SV=1	uncharacterized LOC104416164; K04730 interleukin-1 receptor-associated kinase 1 [EC:2.7.11.1]
yellow	Unigene10946_All	976.889	gi|225426142|PREDICTED: WRKY transcription factor 22-like	gi|568845250|PREDICTED: Citrus sinensis WRKY transcription factor 22-like	Probable WRKY transcription factor 27 OS=Arabidopsis thaliana GN=WRKY27 PE=2 SV=1	WRKY transcription factor 22-like; K13425 WRKY transcription factor 22
yellow	Unigene12663_All	1022	gi|566167217|hypothetical protein POPTR_0004s18310g	gi|470112831|PREDICTED: Fragaria vesca subsp. vesca FAD-dependent urate hydroxylase-like	Zeaxanthin epoxidase, chloroplastic OS=Oncidium hybrid cultivar GN=ZEP PE=2 SV=1	zeaxanthin epoxidase, chloroplastic-like; K09838 zeaxanthin epoxidase [EC:1.14.13.90]
yellow	CL3692.Contig3_All	1052.55	NA	NA	NA	NA
yellow	CL476.Contig1_All	1052.45	gi|590690812|Sugar phosphate exchanger 2, putative	gi|359485392|PREDICTED: Vitis vinifera uncharacterized	NA	NA
yellow	CL2225.Contig1_All	1047.08	gi|595859772|hypothetical protein PRUPE_ppa020532mg	gi|566232784|Populus trichocarpa Ubiquitin-conjugating enzyme E2-17 kDa family protein	NA	NA
yellow	Unigene17120_All	1043.28	gi|PREDICTED: uncharacterized protein LOC100245192	NA	NA	NA
yellow	Unigene14491_All	1038.74	gi|319718165|GAGA-binding transcriptional activator	gi|568215135|Solanum tuberosum barley B recombinant-like protein D-like	Protein BASIC PENTACYSTEINE6 OS=Arabidopsis thaliana GN=BPC6 PE=1 SV=1	NA
yellow	CL8547.Contig2_All	1036.64	gi|330318652|metallothionein-like protein	gi|330318689|Camellia sinensis clone U10BcDNA 1206 metallothionein-like protein type 2a	Metallothionein-like protein 1 OS=Mimulus guttatus PE=3 SV=1	NA
yellow	Unigene2044_All	1034.99	gi|565396228|PREDICTED: uncharacterized protein LOC102580155	gi|590677305|Theobroma cacao Ankyrin repeat and KH domain-containing protein 1	NA	NA
yellow	CL3629.Contig2_All	1022.79	NA	NA	NA	NA
yellow	CL2133.Contig3_All	1019.78	NA	gi|549531652|Vaccinium macrocarpon mitochondrion, complete genome	NA	NA
yellow	CL12020.Contig1_All	1016.15	gi|480328055|gag-pol polyprotein, partial	gi|426263577|Camellia sinensis var. assamica microsatellite DNA locus Csin16	Retrovirus-related Pol polyprotein from transposon TNT 1-94 OS=Nicotiana tabacum PE=2 SV=1	NA
yellow	Unigene1796_All	1014.81	NA	NA	NA	NA
yellow	Unigene16798_All	1012.93	NA	NA	NA	NA
yellow	Unigene15151_All	1010.53	NA	NA	NA	NA
yellow	CL10157.Contig1_All	1010.02	NA	NA	NA	NA
yellow	CL8346.Contig2_All	1005.32	NA	NA	NA	NA
yellow	CL1326.Contig1_All	1005.01	gi|394987256|gb|AFN42875.1|/0/glutamine synthetase	gi|394987255|Camellia sinensis clone 1 glutamine synthetase mRNA, complete cds	NA	NA
yellow	CL2042.Contig2_All	1002.33	gi|297743386|unnamed protein product	gi|359482665|PREDICTED: Vitis vinifera uncharacterized LOC100261739	NA	NA
yellow	CL9058.Contig1_All	1000.67	NA	NA	NA	NA
yellow	CL6667.Contig1_All	996.416	gi|551653921|hypothetical protein GUITHDRAFT_153432	gi|545365829|Coccomyxa subellipsoidea C-169 Phosphoenolpyruvate/pyruvate domain-containing protein	NA	NA
yellow	Unigene18525_All	983.183	gi|567914853|hypothetical protein CICLE_v10017141mg	NA	NA	NA
yellow	Unigene20341_All	982.72	NA	NA	NA	NA
yellow	CL10778.Contig2_All	980.929	NA	NA	NA	NA
yellow	CL1326.Contig2_All	978.658	gi|394987256|glutamine synthetase	gi|394987255|Camellia sinensis clone 1 glutamine synthetase mRNA, complete cds	NA	NA
yellow	CL8547.Contig1_All	972.411	gi|127382|sp Full=Metallothionein-like protein 1	gi|330318689|Camellia sinensis clone U10BcDNA 1206 metallothionein-like protein type 2a	Metallothionein-like protein 1 OS=Mimulus guttatus PE=3 SV=1	NA
yellow	Unigene2064_All	971.318	gi|225459247|PREDICTED: uncharacterized protein LOC100259041	gi|364534893|Sarracenia alata isolate B365.01 genomic region Salata95b_323	NA	NA
yellow	CL1618.Contig3_All	969.122	NA	NA	NA	NA
yellow	CL3904.Contig1_All	961.425	gi|593782003|hypothetical protein PHAVU_003G086300g	gi|460381853|PREDICTED: Solanum lycopersicum uncharacterized LOC101257948	Leucine-rich repeat extensin-like protein 6 OS=Arabidopsis thaliana GN=LRX6 PE=2 SV=1	NA
yellow	CL1640.Contig2_All	961.337	gi|297739879|unnamed protein product	gi|590635342|Theobroma cacao Uncharacterized protein	NA	NA
yellow	CL2133.Contig2_All	961.303	gi|70609694|hypoxia-responsive family protein	gi|239764707|Vitis vinifera strain PN40024 mitochondrion, partial genome	NA	NA
yellow	CL9922.Contig2_All	944.462	gi|449483010|wound-induced protein WIN1-like	gi|359488023|PREDICTED: Vitis vinifera pathogenesis-related protein PR-4B-like	Wound-induced protein WIN1 OS=Solanum tuberosum GN=WIN1 PE=2 SV=1	NA
yellow	Unigene17340_All	942.378	gi|225437501|PREDICTED: uncharacterized protein LOC100245192	gi|225437500|PREDICTED: Vitis vinifera uncharacterized	NA	NA
yellow	CL8630.Contig1_All	935.157	gi|380706600|	gi|449480361|PREDICTED: Cucumis sativus BON1-associated protein 2-like	BON1-associated protein 2 OS=Arabidopsis thaliana GN=BAP2 PE=1 SV=1	NA
yellow	Unigene14031_All	928.61	gi|297741407|unnamed protein product	gi|359475160|PREDICTED: Vitis vinifera plastid division protein PDV2-like	Non-symbiotic hemoglobin 1 OS=Medicago sativa GN=MHB1 PE=2 SV=1	NA
lightcyan	CL6606.Contig1_All	16.8913	gi|590707334|Peroxisomal membrane ABC transporter family, PMP family isoform 4, partial	gi|147767050|Vitis vinifera contig VV78X080982.10, whole genome shotgun sequence	ABC transporter D family member 1 OS=Arabidopsis thaliana GN=ABCC1 PE=1 SV=1	ABC transporter D family member 1; K05677 ATP-binding cassette, subfamily D (ALD), member 3
lightcyan	Unigene19021_All	21.3782	gi|590659056|Cellulose synthase, putative isoform 1	gi|429503499|Camellia sinensis inosine-5'-monophosphate dehydrogenase 1	Cellulose synthase-like protein G2 OS=Arabidopsis thaliana GN=CSLG2 PE=2 SV=1	cellulose synthase A catalytic subunit 9 [UDP-forming]; K10999 cellulose synthase A [EC:2.4.1.12]
lightcyan	CL783.Contig2_All	14.6293	gi|302142524|unnamed protein product	gi|166798280|Brassica rapa subsp. campestris dihydroflavonol-4-reductase 2 protein (DFR2)	Dihydroflavonol-4-reductase OS=Vitis vinifera GN=DFR PE=1 SV=1	dihydroflavonol-4-reductase-like; K13082 bifunctional dihydroflavonol 4-reductase
lightcyan	CL12039.Contig1_All	14.7346	gi|526117653|ripening-related protein-like	gi|393716181|Camellia sinensis DNA, SSR marker, MSE0221	Fruit protein pKIWI501 OS=Actinidia deliciosa GN=pKIWI501 PE=2 SV=1	EMB2766; protein EMBRYO DEFECTIVE 2766; K14306 nuclear pore complex protein Nup62
lightcyan	CL1617.Contig1_All	12.4454	gi|224067918|hypothetical protein POPTR_0002s16380g	gi|147818424|Vitis vinifera contig VV78X250952.7, whole genome shotgun sequence	UDP-glycosyltransferase 91C1 OS=Arabidopsis thaliana GN=UGT91C1 PE=2 SV=1	GmSGT3, Gma.55603; UDP-glycosyltransferase 91A1-like (EC:2.4.1.273); K18823 soyasaponin III rhamnosyltransferase [EC:2.4.1.273]
lightcyan	CL1255.Contig5_All	19.4353	gi|587914310|hypothetical protein L484_024054	gi|255575739|Ricinus communis conserved hypothetical protein	NA	uncharacterized LOC102722400; K12486 stromal membrane-associated protein
lightcyan	CL2654.Contig3_All	19.591	gi|590695697|HXXXD-type acyl-transferase family protein, putative	gi|294846000|Chlamydomonas reinhardtii strain CC-2290 NIC7m	Vinorine synthase OS=Rauvolfia serpentina GN=ACT PE=1 SV=2	vinorine synthase-like; K13065 shikimate O-hydroxycinnamoyltransferase [EC:2.3.1.133]
lightcyan	CL2654.Contig6_All	13.5281	gi|590695697|HXXXD-type acyl-transferase family protein, putative	gi|116637184|Oryza sativa (indica cultivar-group) cDNA clone:OSIGCRA128M18, full insert sequence	Vinorine synthase OS=Rauvolfia serpentina GN=ACT PE=1 SV=2	vinorine synthase-like; K13065 shikimate O-hydroxycinnamoyltransferase [EC:2.3.1.133]
lightcyan	Unigene12040_All	18.6146	NA	NA	NA	NA
lightcyan	CL6539.Contig1_All	14.6575	gi|604315293|hypothetical protein MIMGU_mgv1a002935mg	gi|147799251|Vitis vinifera contig VV78X003963.8, whole genome shotgun sequence	Uncharacterized protein At1g24485 OS=Arabidopsis thaliana GN=RWK1 PE=2 SV=2	NA
lightcyan	CL9312.Contig5_All	12.4984	gi|225426534|PREDICTED: uncharacterized protein LOC100247984 isoform 1	gi|359474168|PREDICTED: Vitis vinifera uncharacterized	NA	NA
